# Supplementary material
Source: MDPI journal article supplement (https://www.mdpi.com/2073-4441/12/5/1436)
Supplement: s1 [file s1]

Archive with 2 entries (2 files):
- Water 773749 Supplementary Material A.pdf
- Water 773749 Supplementary Material B.pdf
