# Supplementary material
Source: MDPI journal article supplement (https://www.mdpi.com/2073-4441/12/5/1436)
Supplement: s1 [file s1 › Water 773749 Supplementary Material B.pdf]

Supplementary Material – Experts Survey Instrument

# Expert opinion valuation method to quantify digital water metering benefits

Ian Monks<sup>1,2</sup>, Rodney A. Stewart<sup>1,2</sup> \*, Oz Sahin<sup>1,2</sup>, Robert Keller<sup>3,4</sup> and Samantha Low-Choy<sup>5</sup>

<sup>1</sup> School of Engineering and Built Environment, Griffith University, 4222 Gold Coast, QLD, Australia, [ian.monks@griffithuni.edu.au](mailto:ian.monks@griffithuni.edu.au) (I.M.), [o.sahin@griffith.edu.au](mailto:o.sahin@griffith.edu.au) (O.S.)

<sup>2</sup> Cities Research Institute, Griffith University, 4222 Gold Coast, QLD, Australia

<sup>3</sup> Civil Engineering Department, Monash University, 3800 Clayton, VIC, Australia, [rjkeller@optusnet.com.au](mailto:rjkeller@optusnet.com.au) (R.K.)

<sup>4</sup> R. J. Keller & Associates, 3150 Edithvale, VIC, Australia

<sup>5</sup> Arts, Education and Law Group/Researcher Education & Development/ Environmental Futures Research Institute, Griffith University, 4122 Mt Gravatt, QLD, Australia, [s.low-choy@griffith.edu.au](mailto:s.low-choy@griffith.edu.au) (S.L.-C.)

\* Correspondence: [r.stewart@griffith.edu.au](mailto:r.stewart@griffith.edu.au)

Received: date; Accepted: date; Published: date

## 1. Introduction

This document is provided as a supplement to the paper, Expert opinion valuation method to quantify digital water metering benefits [1]. It provides

- the survey instrument used by the study

## 2. Expert Survey

## Digital Water Metering Benefits - Experts Survey

### Summary Information:

Researchers at Griffith University are undertaking a study project titled, **Digital Water Metering: A benefits framework & modelling tool for deployment planning**.

This survey seeks the opinions of an expert panel of water industry professionals on the potential of suggested benefits from the introduction of digital water meters.

Your answers to the following questions will provide valuable insights into the benefits that could flow to water companies, Government, households and businesses. It forms part of the data collection for the project.

Firstly there are some questions about you and who you believe will benefit from digital water metering. To reduce the survey length, benefits have then been arranged into blocks of 3 to 9 questions based on areas of expertise. You can select the block or blocks that you feel you can comment on. The other blocks will be skipped. If you do not wish to comment on a particular question just enter "no opinion".

Press the **NEXT** button at the bottom of this page to start the survey.

Further Information: The purpose of the study is to gain an in depth understanding of the benefits from adopting digital water meters and how a deployment plan can deliver benefits to the business and customers earlier. This is crucial information for water authorities and policy makers who need to ensure that we, as a community, have enough water in the future and water services are provided efficiently and sustainably with sufficient information for customers to manage their water use.

The research results will be reported in an academic thesis and will be presented to participating organisations. Results may also be disseminated via journal articles and / or conference presentations.

### **Who should participate?**

The study is aimed at supporting decision making among water authorities and, in particular, those water authorities who are developing business cases for the introduction of digital metering or who are intending to develop a business case. Water authorities who have started a rollout program may also benefit. Additionally there are a number of Government bodies and technology suppliers who will be asked to support the study. If you have been contacted for an interview and for some reason you prefer not to take part, please let us know by return email to [ian.monks@griffithuni.edu.au](mailto:ian.monks@griffithuni.edu.au).

### **What do I have to do if I participate?**

Our research requires us to collect data and information over a two year period. We ask that you complete this survey with as much detail as you can provide. The survey is anonymous and confidential. Contact details of the researchers are listed below. If you would like to participate further by being interviewed and/or provide data or further information please contact the student researcher, Ian Monks.

If you are interviewed:

1. **Consent:** We will seek and require your **written consent**.
2. **Process:** We will ask you to meet with our researchers who will want to discover information about your current water supply network, social and geographic situation, customer base, your current metering practices, plans for introducing digital metering, customer concerns arising from metering and the issues that impact your decisions. The interviews will be recorded for transcription purposes.
3. **Provision of data:** We will need to request data from you to enable the project to quantify aspects of your business and the introduction of digital metering. By necessity the meter data will cover details of customer water usage and other dealings with your company. The data should be non-identifiable where appropriate before being provided to the researchers so that the privacy of your customers is maintained. Data files from companies should be named to include your company's name to identify your data and will be held in separate folders from other company data in the University's research storage facility.
4. **Provision of information:** Where possible information about your company will be sourced from the public domain. However we would like to request other commercially sensitive information such as business cases, proof of concept plans and reports, etc. These documents should be marked "Commercial in Confidence" and will be treated as such. Documents from companies should be named to include the source company's name and will be held in separate folders from other company information in the University's research storage facility.
5. **Storage, Retention and Deletion of data and information:** All audio recordings will be erased after transcription. However, other research data (interview transcripts, de-identified data, documents and analysis) will be retained in a locked cabinet and/or a password protected electronic file at Griffith University for a period of five years before being destroyed. Griffith University provides the GU Research Storage platform for this purpose.

**How long will the interview take?**

The researchers anticipate that the interview will take approximately 2 hours. A second interview of 1 hour to clarify some issues may be required. Data and information collection time will be additional to these times.

**Are there any risks involved in taking part in the study?**

So long as data is de-identified and the data and information are clearly named as belonging to the source company we do not anticipate any risks associated with this research through customers

being identified or company data being mis-identified. If you have any concerns about any aspects of the study, please contact Mr Ian Monks (see below for contact details).

**Will the privacy of participants taking part in the study be protected?**

The conduct of this research involves the collection, access and/or use of your identified personal information. The information collected is confidential and will not be disclosed to third parties without your consent, except to meet government, legal or other regulatory authority requirements. A de-identified copy of this data may be used for other research purposes. However, your anonymity will at all times be safeguarded. For further information consult the University's Privacy Plan at <http://www.griffith.edu.au/about-griffith/plans-publications/griffith-university-privacy-plan> or telephone (07) 3735 4375.

Your data and information will be completely confidential and will only be used for the purposes of the research project. The data will be released as summaries in which no individual's answers can be identified.

**What do I do if I decide I don't want to be part of the study?**

You are free to withdraw from the study at any time without penalty or explanation. If you decide to withdraw, you can ask for any or all of your data to be removed from the study. Simply contact Mr Ian Monks (see contact details below).

**Will I receive any payment for taking part in the study?**

No.

**(Interviewees only: How can I find out more about the study?**

If you would like to receive a summary of the findings of the study, please tick the box on the consent form. In addition, please feel free to contact us at any time during the study.)

**What is the best way to contact someone about the research?**

Please feel free to contact Mr Ian Monks about any aspect of this project:

Phone: (number omitted); Email: [ian.monks@griffithuni.edu.au](mailto:ian.monks@griffithuni.edu.au) ; postal address: (address omitted).

This study has been cleared in accordance with the ethical review processes of the Griffith University. If you have any questions concerning your participation in the study feel free to contact the researchers involved.

Griffith University conducts research in accordance with the National Statement on Ethical Conduct in Human Research. If you have any concerns or complaints about the ethical conduct of this

124 research project, you are encouraged to contact the Manager, Research Ethics on (07) 3735 4375 or  
125 [research-ethics@griffith.edu.au](mailto:research-ethics@griffith.edu.au).

126 GU Ethics Reference # 2018/271

127 Thank you for your help with this very important research.

Chief Investigator:

Prof. Rodney Stewart

School of Engineering and Built Environment

Griffith University

Tel: 07 5552 8778

Email: [r.stewart@griffith.edu.au](mailto:r.stewart@griffith.edu.au)

Student Researcher:

Mr Ian Monks

Master of Philosophy Candidate

School of Engineering

Griffith University

Tel: (number omitted)

Email: [ian.monks@griffithuni.edu.au](mailto:ian.monks@griffithuni.edu.au)

Associate Investigator:

Dr Oz Sahin

School of Engineering and Built Environment

Griffith University

Tel: 07 5552 7378

Email: [o.sahin@griffith.edu.au](mailto:o.sahin@griffith.edu.au)

External Supervisor:

Dr Robert Keller

128

129

130 Please note that this research forms a component of the student's academic program.

131 There are 94 questions in this survey

132 **Your Consent**

133 A question to gain your consent to proceed to this survey which is being conducted by researchers at  
134 Griffith University under GU Ethics Reference # 2018/271.

135 **[[Completion of this survey is voluntary and you may quit at any time. Your participation is**  
136 **anonymous. By completing this survey, you are giving your consent to participate in this study.**

137 **Do you consent to participating and wish to proceed with this survey?**

138 \*

139 Please choose **only one** of the following:

- 140 • ☐ Yes  
141 • ☐ No

142 **About you**

143 Some questions about you and your area of expertise, your role in the water industry, your time in  
144 the water industry and your experience with digital water meters.

145 []

146 **What do you consider your areas of experience and expertise?**

147 \*

148 **Only answer this question if the following conditions are met:**

149 Answer was 'Yes' at question '1 [A2]' (Completion of this survey is voluntary and you may quit at  
150 any time. Your participation is anonymous. By completing this survey, you are giving your consent  
151 to participate in this study. Do you consent to participating and wish to proceed with this survey? )

152 Check all that apply

153  
154 Please choose **all** that apply:

- 155 • ☐ Customer Service  
156 • ☐ Engineering Planning  
157 • ☐ Engineering Operations  
158 • ☐ Metering  
159 • ☐ Finance  
160 • ☐ Legal / Regulation / Corporate Services  
161 • ☐ Senior Management  
162 • ☐ Human Resources  
163 • ☐ Information Technology  
164 • ☐ Academic

- 165 • ☐ Other:

166

167 **[[What is your current role? \***

168 **Only answer this question if the following conditions are met:**

169 Answer was 'Yes' at question '1 [A2]' (Completion of this survey is voluntary and you may quit at  
170 any time. Your participation is anonymous. By completing this survey, you are giving your consent  
171 to participate in this study. Do you consent to participating and wish to proceed with this survey? )

172 Please write your answer here:

173

174 **[[How long have you worked in the water industry or in your area or expertise? \***

175 **Only answer this question if the following conditions are met:**

176 Answer was 'Yes' at question '1 [A2]' (Completion of this survey is voluntary and you may quit at  
177 any time. Your participation is anonymous. By completing this survey, you are giving your consent  
178 to participate in this study. Do you consent to participating and wish to proceed with this survey? )

179 Choose one of the following answers

180

181 Please choose **only one** of the following:

- 182 • ☐ 0-2 years  
183 • ☐ 3-5 years  
184 • ☐ 6-10 years  
185 • ☐ 11-20 years  
186 • ☐ more than 20 years

187 **[[To what extent does your experience/knowledge include digital water metering? \***

188 **Only answer this question if the following conditions are met:**

189 Answer was 'Yes' at question '1 [A2]' (Completion of this survey is voluntary and you may quit at  
190 any time. Your participation is anonymous. By completing this survey, you are giving your consent  
191 to participate in this study. Do you consent to participating and wish to proceed with this survey? )

192 Choose one of the following answers

193

194 Please choose **only one** of the following:

- 195 • ☐ Full rollout of digital water metering  
196 • ☐ In progress rollout of digital water metering

- 197 • ☐ Completed or in-progress trial(s) of digital water metering
- 198 • ☐ Planning a trial(s) of digital water metering
- 199 • ☐ Peripheral role in metering and/or digital metering area
- 200 • ☐ Public information and presentations on digital water metering only
- 201 • ☐ No current knowledge or experience/Water industry general knowledge only

## 202 **Benefiting Groups**

203 Who do you believe will benefit most from digital water metering?

204 **[]Business Units. Which of the business units listed below do you think will benefit from digital**  
 205 **water metering? (Select one or many) \***

206 **Only answer this question if the following conditions are met:**

207 Answer was 'Yes' at question '1 [A2]' (Completion of this survey is voluntary and you may quit at  
 208 any time. Your participation is anonymous. By completing this survey, you are giving your consent  
 209 to participate in this study. Do you consent to participating and wish to proceed with this survey? )

210 Check all that apply

211

212 Please choose **all** that apply:

- 213 • ☐ Customer Service
- 214 • ☐ Engineering Planning
- 215 • ☐ Engineering Operations
- 216 • ☐ Metering
- 217 • ☐ Finance
- 218 • ☐ Legal / Regulation / Corporate Services
- 219 • ☐ Senior Management
- 220 • ☐ Human Resources
- 221 • ☐ Information Technology
- 222 • ☐ No significant benefiting business units
- 223 • ☐ No opinion
- 224 • ☐ Other:

225

226 []

227 **Stakeholders.**

228 **To what extent do you expect the following stakeholders will benefit from digital water**  
 229 **metering?**

230 **(1 = No benefit, 2 = Low, 3 = Moderate, 4 = High, 5 = Very high)**

231 \*

232 **Only answer this question if the following conditions are met:**

233 Answer was 'Yes' at question '1 [A2]' (Completion of this survey is voluntary and you may quit at  
234 any time. Your participation is anonymous. By completing this survey, you are giving your consent  
235 to participate in this study. Do you consent to participating and wish to proceed with this survey? )

236 Please choose the appropriate response for each item:

|                                                                 | 1                     | 2                     | 3                     | 4                     | 5                     |
|-----------------------------------------------------------------|-----------------------|-----------------------|-----------------------|-----------------------|-----------------------|
| <b>Residential customers</b>                                    | <input type="radio"/> |
| <b>Business customers</b>                                       | <input type="radio"/> |
| <b>Owner of water business (often Governments in Australia)</b> | <input type="radio"/> |

237 **Where to now?**

238 Survey customisation based on your expertise.

239 **[Which blocks of potential benefits would you like to comment on? (Only questions in selected  
240 blocks will be presented.) \***

241 **Only answer this question if the following conditions are met:**

242 Answer was 'Yes' at question '1 [A2]' (Completion of this survey is voluntary and you may quit at  
243 any time. Your participation is anonymous. By completing this survey, you are giving your consent  
244 to participate in this study. Do you consent to participating and wish to proceed with this survey? )

245 Check all that apply

246  
247 Please choose **all** that apply:

- 248 • ☐ **Meter Reading** - benefits related to the cost and issues of meter reading including cost of  
249 manual reading and energy, estimated reads, special reads, OHS issues for meter readers
- 250 • ☐ **Metering and non-revenue water** - benefits related to metering of properties and  
251 non-revenue water including data error rates, water theft, leak detection
- 252 • ☐ **Meter Management and Data** - benefits related to selecting and managing meters  
253 including compliance, deferred replacement, meter sizing, meter failure analytics
- 254 • ☐ **Finances** - benefits related to the water business finances including revenue forecasting,  
255 cash flow, tariffs, load shifting, value of assets, insurance claims and costs
- 256 • ☐ **Engineering (operations)** - benefits related to the day to day operation of the water and  
257 sewer networks
- 258 • ☐ **Engineering (planning)** - benefits related to planning the water network, deferred  
259 augmentation, uncertainty and risk margin

- ☐ **Knowledge of customer demand for planning** - benefits related to planning issues using new knowledge of property use, customer demand patterns and water use in special precincts
- ☐ **Customer water efficiency** - benefits related to customers' efficient use of water: leak alerting, awareness, bill prediction, monthly billing
- ☐ **Customer complaints and assistance** - benefits related to customer complaints, complaint resolution and assistance programs including insurance claims arising from concealed leak
- ☐ **Customer communication** - benefits related to enhanced communication to customers arising from more data and new knowledge of customers
- ☐ **New products and services** - benefits related to a range of new products and services enabled by digital water metering
- ☐ **Legal actions** - benefits related to legal action over water use and unpaid accounts

## **Meter Reading**

This block of potential benefits relate to meter reading.

It covers meter reading costs, special and estimated reads and the physical aspects of meter reading.

□

**Do you want to proceed to enter comments on the benefits related to meter reading?**

**(For each suggested benefit, if possible, please include in the text boxes below an explanation for your opinion.**

**Please try to cover some of the following aspects in your response:**

- Discuss the extent of the benefit (eg % reduction), and any evidence you may have to support that level of benefit
- Discuss any examples where you have seen that benefit being demonstrated in smart meter pilot trials or roll-outs
- Discuss any barriers that may need to be overcome before the benefit can be fully extracted from a smart meter system.)

\*

**Only answer this question if the following conditions are met:**

Answer was 'Yes' at question '1 [A2]' (Completion of this survey is voluntary and you may quit at any time. Your participation is anonymous. By completing this survey, you are giving your consent to participate in this study. Do you consent to participating and wish to proceed with this survey? ) and Answer was at question '8 [D0]' (Which blocks of potential benefits would you like to comment on? (Only questions in selected blocks will be presented.))

Please choose **only one** of the following:

- 294 • ☐ Yes  
295 • ☐ No

296 []

297 From your experience/knowledge, will water businesses benefit from a reduction in meter  
298 reading charges/billing costs, and to what extent?

299 **BACKGROUND:** Manually read meters require meter readers to walk or drive the reading route,  
300 stop at each meter location, find the meter, open the dial cover, read the meter and enter the  
301 reading to a handheld device. They complete the reading route by uploading the data file values  
302 into a database. Electronic reading can enable the reading to be taken across a communications  
303 network eliminating the meter reader cost (but replaced by a lower communications cost).

304 \*

305 **Only answer this question if the following conditions are met:**

306 Answer was 'Yes' at question '9 [D1]' (Do you want to proceed to enter comments on the benefits  
307 related to meter reading? (For each suggested benefit, if possible, please include in the text boxes  
308 below an explanation for your opinion. Please try to cover some of the following aspects in your  
309 response: - Discuss the extent of the benefit (eg % reduction), and any evidence you may have to  
310 support that level of benefit - Discuss any examples where you have seen that benefit being  
311 demonstrated in smart meter pilot trials or roll-outs - Discuss any barriers that may need to be  
312 overcome before the benefit can be fully extracted from a smart meter system.) )

313 Please write your answer here:

314

315 []

316 From your experience/knowledge, will water businesses benefit from a reduction in special  
317 meter reads, and to what extent?

318 **BACKGROUND:** When customers leave properties the water meter needs to be read to enable  
319 the leaving customer to be billed and the arriving customer to start from zero. By taking the  
320 electronic reading of the meter at a nominated date and time can eliminate meter readers having  
321 to visit the property.

322 \*

323 **Only answer this question if the following conditions are met:**

324 Answer was 'Yes' at question '9 [D1]' (Do you want to proceed to enter comments on the benefits  
325 related to meter reading? (For each suggested benefit, if possible, please include in the text boxes  
326 below an explanation for your opinion. Please try to cover some of the following aspects in your

response: - Discuss the extent of the benefit (eg % reduction),and any evidence you may have to support that level of benefit - Discuss any examples where you have seen that benefit being demonstrated in smart meter pilot trials or roll-outs - Discuss any barriers that may need to be overcome before the benefit can be fully extracted from a smart meter system.) )

Please write your answer here:

□

**From your experience/knowledge, will water businesses benefit from a reduction in estimated bills, and to what extent?**

**BACKGROUND:** Meters that cannot be read due to access issues are estimated. Often these estimates are inaccurate and cause customers to raise complaints. Collecting the data electronically could eliminate the estimated reads.

\*

**Only answer this question if the following conditions are met:**

Answer was 'Yes' at question '9 [D1]' (Do you want to proceed to enter comments on the benefits related to meter reading? (For each suggested benefit, if possible, please include in the text boxes below an explanation for your opinion. Please try to cover some of the following aspects in your response: - Discuss the extent of the benefit (eg % reduction),and any evidence you may have to support that level of benefit - Discuss any examples where you have seen that benefit being demonstrated in smart meter pilot trials or roll-outs - Discuss any barriers that may need to be overcome before the benefit can be fully extracted from a smart meter system.) )

Please write your answer here:

□

**From your experience/knowledge, will water businesses benefit from a reduction in OHS incidence costs, and to what extent?**

**BACKGROUND:** It is possible that with meter readers no longer walking the reading routes they will avoid issues such as dogs, pits, bushes etc, or stop/start driving between reads in rural areas and so the incidence of OHS cases could be expected to drop.

\*

**Only answer this question if the following conditions are met:**

Answer was 'Yes' at question '9 [D1]' (Do you want to proceed to enter comments on the benefits related to meter reading? (For each suggested benefit, if possible, please include in the text boxes below an explanation for your opinion. Please try to cover some of the following aspects in your response: - Discuss the extent of the benefit (eg % reduction), and any evidence you may have to support that level of benefit - Discuss any examples where you have seen that benefit being demonstrated in smart meter pilot trials or roll-outs - Discuss any barriers that may need to be overcome before the benefit can be fully extracted from a smart meter system.) )

Please write your answer here:

□

**From your experience/knowledge, will water businesses benefit from a reduction in vehicle energy costs (GHG emissions), and to what extent?**

**BACKGROUND:** It is possible that with meter readers no longer driving to their reading routes and an almost complete elimination of special reads, vehicle energy costs and their input to the Greenhouse Gas emissions could be reduced.

\*

**Only answer this question if the following conditions are met:**

Answer was 'Yes' at question '9 [D1]' (Do you want to proceed to enter comments on the benefits related to meter reading? (For each suggested benefit, if possible, please include in the text boxes below an explanation for your opinion. Please try to cover some of the following aspects in your response: - Discuss the extent of the benefit (eg % reduction), and any evidence you may have to support that level of benefit - Discuss any examples where you have seen that benefit being demonstrated in smart meter pilot trials or roll-outs - Discuss any barriers that may need to be overcome before the benefit can be fully extracted from a smart meter system.) )

Please write your answer here:

□

**From your experience/knowledge, will water businesses benefit from a reduction in billing and collection costs with monthly electronic billing and collection, and to what extent?**

**BACKGROUND:** It has been suggested that water businesses may be able to offer monthly billing to customers using the automated reading taken at a nominated day and time within a month of readings. This would likely treble the postal charges. eBilling could significantly

reduce the extra “mailing” cost. Further coupling of eBilling with direct debit could improve the potential for on-time payment and reduction in reminders and other debt recovery expenses.

\*

**Only answer this question if the following conditions are met:**

Answer was 'Yes' at question '9 [D1]' (Do you want to proceed to enter comments on the benefits related to meter reading? (For each suggested benefit, if possible, please include in the text boxes below an explanation for your opinion. Please try to cover some of the following aspects in your response: - Discuss the extent of the benefit (eg % reduction), and any evidence you may have to support that level of benefit - Discuss any examples where you have seen that benefit being demonstrated in smart meter pilot trials or roll-outs - Discuss any barriers that may need to be overcome before the benefit can be fully extracted from a smart meter system.) )

Please write your answer here:

#### **Metering and non-revenue water**

This block of potential benefits covers metering and non-revenue water issues.

[]

**Do you want to proceed to enter comments on the benefits related to non-revenue water?**

(For each suggested benefit, if possible, please include in the text boxes below an explanation for your opinion.

**Please try to cover some of the following aspects in your response:**

- Discuss the extent of the benefit (eg % reduction), and any evidence you may have to support that level of benefit

- Discuss any examples where you have seen that benefit being demonstrated in smart meter pilot trials or roll-outs

- Discuss any barriers that may need to be overcome before the benefit can be fully extracted from a smart meter system.)

\*

**Only answer this question if the following conditions are met:**

Answer was 'Yes' at question '1 [A2]' (Completion of this survey is voluntary and you may quit at any time. Your participation is anonymous. By completing this survey, you are giving your consent to participate in this study. Do you consent to participating and wish to proceed with this survey? ) and Answer was at question '8 [D0]' (Which blocks of potential benefits would you like to comment on? (Only questions in selected blocks will be presented.))

423 Please choose **only one** of the following:

- 424 • ☐ Yes  
425 • ☐ No

426 []

427 From your experience/knowledge, will water businesses benefit from reduced residential  
428 non-revenue water data errors/losses, and to what extent?

429 **BACKGROUND:** Billing errors can be caused by lost, damaged and stolen meters, incorrect  
430 meter readings, poorly fitted meter installations and mismatching meter/customer, and other  
431 incorrect metering details such as units and multiplier lead to non-revenue water. Meter errors  
432 become compounded as the reads are used for calculating sewer charges. It is possible that  
433 automated reading could eliminate some of these errors or assist in quickly identifying  
434 anomalies and resolving the issues.

435 \*

436 **Only answer this question if the following conditions are met:**

437 Answer was 'Yes' at question '16 [D2]' (Do you want to proceed to enter comments on the benefits  
438 related to non-revenue water? (For each suggested benefit, if possible, please include in the text  
439 boxes below an explanation for your opinion. Please try to cover some of the following aspects in  
440 your response: - Discuss the extent of the benefit (eg % reduction), and any evidence you may have to  
441 support that level of benefit - Discuss any examples where you have seen that benefit being  
442 demonstrated in smart meter pilot trials or roll-outs - Discuss any barriers that may need to be  
443 overcome before the benefit can be fully extracted from a smart meter system.) )

444 Please write your answer here:

445

446 []

447 From your experience/knowledge, will water businesses benefit from reduced non-residential  
448 customers' non-revenue water data errors/losses, and to what extent?

449 **BACKGROUND:** For non-residential customers, as well as those errors that affect residential  
450 customers, changes in property use can result in inappropriate sized meter for the changed  
451 demand and peak flows resulting in under-recording or excessive wear on mechanical parts. It is  
452 possible that automated reading could eliminate some of these errors or assist in quickly  
453 resolving the issues.

454 \*

**Only answer this question if the following conditions are met:**

Answer was 'Yes' at question '16 [D2]' (Do you want to proceed to enter comments on the benefits related to non-revenue water? (For each suggested benefit, if possible, please include in the text boxes below an explanation for your opinion. Please try to cover some of the following aspects in your response: - Discuss the extent of the benefit (eg % reduction), and any evidence you may have to support that level of benefit - Discuss any examples where you have seen that benefit being demonstrated in smart meter pilot trials or roll-outs - Discuss any barriers that may need to be overcome before the benefit can be fully extracted from a smart meter system.) )

Please write your answer here:

□

**From your experience/knowledge, will water businesses benefit from a reduction in water theft, and to what extent?**

**BACKGROUND:** Hourly demand data readings from customer meters coupled with DMA water balance data could reveal anomalies through unusual patterns that might indicate meter damage or possible water theft.

\*

**Only answer this question if the following conditions are met:**

Answer was 'Yes' at question '16 [D2]' (Do you want to proceed to enter comments on the benefits related to non-revenue water? (For each suggested benefit, if possible, please include in the text boxes below an explanation for your opinion. Please try to cover some of the following aspects in your response: - Discuss the extent of the benefit (eg % reduction), and any evidence you may have to support that level of benefit - Discuss any examples where you have seen that benefit being demonstrated in smart meter pilot trials or roll-outs - Discuss any barriers that may need to be overcome before the benefit can be fully extracted from a smart meter system.) )

Please write your answer here:

□

**From your experience/knowledge, will water businesses benefit from a reduction in labour costs associated with leak detection, and to what extent?**

**BACKGROUND:** With more data and at hourly intervals from property meters the labour effort required to detect, localise and find leaks could be reduced.

487 \*

488 **Only answer this question if the following conditions are met:**

489 Answer was 'Yes' at question '16 [D2]' (Do you want to proceed to enter comments on the benefits  
490 related to non-revenue water? (For each suggested benefit, if possible, please include in the text  
491 boxes below an explanation for your opinion. Please try to cover some of the following aspects in  
492 your response: - Discuss the extent of the benefit (eg % reduction),and any evidence you may have to  
493 support that level of benefit - Discuss any examples where you have seen that benefit being  
494 demonstrated in smart meter pilot trials or roll-outs - Discuss any barriers that may need to be  
495 overcome before the benefit can be fully extracted from a smart meter system.) )

496 Please write your answer here:

497

498 **Managing Meters and Data**

499 This block of potential benefits covers the selection and managing of meters for accuracy and  
500 compliance.

501 []

502 **Do you want to proceed to enter comments on the benefits related to meter selection and**  
503 **management for accuracy and compliance (including some use of data analytics)?**

504 **(For each suggested benefit, if possible, please include in the text boxes below an explanation for**  
505 **your opinion.**

506 **Please try to cover some of the following aspects in your response:**

507 **- Discuss the extent of the benefit (eg % reduction),and any evidence you may have to support**  
508 **that level of benefit**

509 **- Discuss any examples where you have seen that benefit being demonstrated in smart meter**  
510 **pilot trials or roll-outs**

511 **- Discuss any barriers that may need to be overcome before the benefit can be fully extracted**  
512 **from a smart meter system.)**

513 \*

514 **Only answer this question if the following conditions are met:**

515 Answer was 'Yes' at question '1 [A2]' (Completion of this survey is voluntary and you may quit at  
516 any time. Your participation is anonymous. By completing this survey, you are giving your consent  
517 to participate in this study. Do you consent to participating and wish to proceed with this survey? )  
518 *and* Answer was at question '8 [D0]' (Which blocks of potential benefits would you like to comment  
519 on? (Only questions in selected blocks will be presented.))

520 Please choose **only one** of the following:

- 521 • ☐ Yes  
522 • ☐ No

523 []

524 From your experience/knowledge, will water businesses benefit from deferred meter  
525 replacement (thru water conservation, targeted replacement), and to what extent?

526 **BACKGROUND:** Meter replacement has usually been based on age or nominal volume of water  
527 through the meter. The age limit used is generally between 10 and 15 years but studies have  
528 found most meters are still operating within compliance limits at these ages. Using data analytics  
529 it is suggested that compliant meters can be identified and retained while non-compliant meters  
530 can be removed.

531 \*

532 **Only answer this question if the following conditions are met:**

533 Answer was 'Yes' at question '21 [D3]' (Do you want to proceed to enter comments on the benefits  
534 related to meter selection and management for accuracy and compliance (including some use of  
535 data analytics)? (For each suggested benefit, if possible, please include in the text boxes below an  
536 explanation for your opinion. Please try to cover some of the following aspects in your response: -  
537 Discuss the extent of the benefit (eg % reduction), and any evidence you may have to support that  
538 level of benefit - Discuss any examples where you have seen that benefit being demonstrated in  
539 smart meter pilot trials or roll-outs - Discuss any barriers that may need to be overcome before the  
540 benefit can be fully extracted from a smart meter system.) )

541 Please write your answer here:

542

543 []

544 From your experience/knowledge, will water businesses be able to use data from digital water  
545 meters to develop meter over-sizing identifiers, and to what extent would they benefit?

546 **BACKGROUND** Over-sized meters cause usage to be under recorded and the result is  
547 non-revenue water. Benchmarking non-residential customers could enable customers that have  
548 over-sized meters to be identified. Their meter could then be replaced with a more suitable sized  
549 meter.

550 \*

**Only answer this question if the following conditions are met:**

Answer was 'Yes' at question '21 [D3]' (Do you want to proceed to enter comments on the benefits related to meter selection and management for accuracy and compliance (including some use of data analytics)? (For each suggested benefit, if possible, please include in the text boxes below an explanation for your opinion. Please try to cover some of the following aspects in your response: - Discuss the extent of the benefit (eg % reduction), and any evidence you may have to support that level of benefit - Discuss any examples where you have seen that benefit being demonstrated in smart meter pilot trials or roll-outs - Discuss any barriers that may need to be overcome before the benefit can be fully extracted from a smart meter system.) )

Please write your answer here:

□

**From your experience/knowledge, will water businesses be able to use digital water meter data to improve meter sizing for non-residential customers, and to what extent would they benefit?**

**BACKGROUND:** It is possible to log usage data at high frequency. For different customer types profiles might be developed from a sample of customers. It may then be possible to use simulated modelling based on these segment peers to work out the meters that best fit the operating characteristics of each business.

\*

**Only answer this question if the following conditions are met:**

Answer was 'Yes' at question '21 [D3]' (Do you want to proceed to enter comments on the benefits related to meter selection and management for accuracy and compliance (including some use of data analytics)? (For each suggested benefit, if possible, please include in the text boxes below an explanation for your opinion. Please try to cover some of the following aspects in your response: - Discuss the extent of the benefit (eg % reduction), and any evidence you may have to support that level of benefit - Discuss any examples where you have seen that benefit being demonstrated in smart meter pilot trials or roll-outs - Discuss any barriers that may need to be overcome before the benefit can be fully extracted from a smart meter system.) )

Please write your answer here:

□

**From your experience/knowledge, will water businesses be able to use digital water meter data for tighter meter performance/NMI compliance monitoring, and to what extent would they benefit?**

**BACKGROUND:** Meters are required to operate within accuracy limits (+/-4%). Using data analytics it may be possible to effectively undertake in-situ testing from the desktop when data is collected frequently and at regular intervals.

\*

**Only answer this question if the following conditions are met:**

Answer was 'Yes' at question '21 [D3]' (Do you want to proceed to enter comments on the benefits related to meter selection and management for accuracy and compliance (including some use of data analytics)? (For each suggested benefit, if possible, please include in the text boxes below an explanation for your opinion. Please try to cover some of the following aspects in your response: - Discuss the extent of the benefit (eg % reduction), and any evidence you may have to support that level of benefit - Discuss any examples where you have seen that benefit being demonstrated in smart meter pilot trials or roll-outs - Discuss any barriers that may need to be overcome before the benefit can be fully extracted from a smart meter system.) )

Please write your answer here:

[]

**From your experience/knowledge, will water businesses be able to use digital water meter data to undertake meter failure analytics, and to what extent would they benefit?**

**BACKGROUND:** It is speculated that changes in usage recorded over time or a gradual shift away from a customer's peers within a segment may be an indicator of declining performance and that data analytics could identify these failing meters.

\*

**Only answer this question if the following conditions are met:**

Answer was 'Yes' at question '21 [D3]' (Do you want to proceed to enter comments on the benefits related to meter selection and management for accuracy and compliance (including some use of data analytics)? (For each suggested benefit, if possible, please include in the text boxes below an explanation for your opinion. Please try to cover some of the following aspects in your response: - Discuss the extent of the benefit (eg % reduction), and any evidence you may have to support that level of benefit - Discuss any examples where you have seen that benefit being demonstrated in smart meter pilot trials or roll-outs - Discuss any barriers that may need to be overcome before the benefit can be fully extracted from a smart meter system.) )

Please write your answer here:

[]

From your experience/knowledge, will water businesses be able to use digital water meter data for meter silting detection (large meters), and to what extent would they benefit?

**BACKGROUND:** It is speculated that a gradually decreasing trend in water consumption over time may provide an indicator of meter silting problem in large meters.

\*

**Only answer this question if the following conditions are met:**

Answer was 'Yes' at question '21 [D3]' (Do you want to proceed to enter comments on the benefits related to meter selection and management for accuracy and compliance (including some use of data analytics)? (For each suggested benefit, if possible, please include in the text boxes below an explanation for your opinion. Please try to cover some of the following aspects in your response: - Discuss the extent of the benefit (eg % reduction), and any evidence you may have to support that level of benefit - Discuss any examples where you have seen that benefit being demonstrated in smart meter pilot trials or roll-outs - Discuss any barriers that may need to be overcome before the benefit can be fully extracted from a smart meter system.) )

Please write your answer here:

[]

From your experience/knowledge, will water businesses be able to use digital water meter data to detect revenue losses caused by declining or failed meter accuracy after break in main, and to what extent would they benefit?

**BACKGROUND:** Meters that are located downstream of breaks in the network may have their accuracy compromised by grit and other sediment entering the pipe at the break despite flushing and other preventative actions.

\*

**Only answer this question if the following conditions are met:**

Answer was 'Yes' at question '21 [D3]' (Do you want to proceed to enter comments on the benefits related to meter selection and management for accuracy and compliance (including some use of data analytics)? (For each suggested benefit, if possible, please include in the text boxes below an explanation for your opinion. Please try to cover some of the following aspects in your response: - Discuss the extent of the benefit (eg % reduction), and any evidence you may have to support that level of benefit - Discuss any examples where you have seen that benefit being demonstrated in

smart meter pilot trials or roll-outs - Discuss any barriers that may need to be overcome before the benefit can be fully extracted from a smart meter system.) )

Please write your answer here:

## Finances

This block of potential benefits relates to water business finances, tariffs and insurance costs.

[]

**Do you want to proceed to comment on potential benefits related to finances, tariffs and insurance costs?**

**(For each suggested benefit, if possible, please include in the text boxes below an explanation for your opinion.**

**Please try to cover some of the following aspects in your response:**

**- Discuss the extent of the benefit (eg % reduction), and any evidence you may have to support that level of benefit**

**- Discuss any examples where you have seen that benefit being demonstrated in smart meter pilot trials or roll-outs**

**- Discuss any barriers that may need to be overcome before the benefit can be fully extracted from a smart meter system.)**

\*

**Only answer this question if the following conditions are met:**

Answer was 'Yes' at question '1 [A2]' (Completion of this survey is voluntary and you may quit at any time. Your participation is anonymous. By completing this survey, you are giving your consent to participate in this study. Do you consent to participating and wish to proceed with this survey? ) and Answer was at question '8 [D0]' (Which blocks of potential benefits would you like to comment on? (Only questions in selected blocks will be presented.))

Please choose **only one** of the following:

- ☐ Yes
- ☐ No

[]

**From your experience/knowledge will water businesses benefit from digital water meters through improved revenue forecasting/recovery, and to what extent?**

**BACKGROUND:** If customer usage is being tracked hourly for all customers the opportunity may exist to write periodic reports to accurately capture revenue earned and project that through to period-end amounts.

\*

**Only answer this question if the following conditions are met:**

Answer was 'Yes' at question '29 [E1]' (Do you want to proceed to comment on potential benefits related to finances, tariffs and insurance costs? (For each suggested benefit, if possible, please include in the text boxes below an explanation for your opinion. Please try to cover some of the following aspects in your response: - Discuss the extent of the benefit (eg % reduction), and any evidence you may have to support that level of benefit - Discuss any examples where you have seen that benefit being demonstrated in smart meter pilot trials or roll-outs - Discuss any barriers that may need to be overcome before the benefit can be fully extracted from a smart meter system.) )

Please write your answer here:

□

From your experience/knowledge will water businesses benefit from digital water meters through improved cash flow/reduced working capital from monthly billing, and to what extent?

**BACKGROUND:** It is suggested that monthly rather than quarterly billing increases cash flow and reduces the working capital requirements of water businesses.

\*

**Only answer this question if the following conditions are met:**

Answer was 'Yes' at question '29 [E1]' (Do you want to proceed to comment on potential benefits related to finances, tariffs and insurance costs? (For each suggested benefit, if possible, please include in the text boxes below an explanation for your opinion. Please try to cover some of the following aspects in your response: - Discuss the extent of the benefit (eg % reduction), and any evidence you may have to support that level of benefit - Discuss any examples where you have seen that benefit being demonstrated in smart meter pilot trials or roll-outs - Discuss any barriers that may need to be overcome before the benefit can be fully extracted from a smart meter system.) )

Please write your answer here:

□

From your experience/knowledge will water businesses benefit from digital water meters through more flexible tariffs by industry, and to what extent?

**BACKGROUND:** With meters being read hourly, it may be possible and worthwhile to offer tariffs that are more flexible so as to be time of day and day of week dependent. This might be used in specific industries and to residential users.

\*

**Only answer this question if the following conditions are met:**

Answer was 'Yes' at question '29 [E1]' (Do you want to proceed to comment on potential benefits related to finances, tariffs and insurance costs? (For each suggested benefit, if possible, please include in the text boxes below an explanation for your opinion. Please try to cover some of the following aspects in your response: - Discuss the extent of the benefit (eg % reduction), and any evidence you may have to support that level of benefit - Discuss any examples where you have seen that benefit being demonstrated in smart meter pilot trials or roll-outs - Discuss any barriers that may need to be overcome before the benefit can be fully extracted from a smart meter system.) )

Please write your answer here:

[]

From your experience/knowledge will water businesses benefit from digital water meters through load shifting (leveling), and to what extent?

**BACKGROUND:** It is suggested that digital water metering might enable tariffs to be altered for the specific purpose of levelling demand from the typical two peak diurnal curves encouraging more off-peak usage.

\*

**Only answer this question if the following conditions are met:**

Answer was 'Yes' at question '29 [E1]' (Do you want to proceed to comment on potential benefits related to finances, tariffs and insurance costs? (For each suggested benefit, if possible, please include in the text boxes below an explanation for your opinion. Please try to cover some of the following aspects in your response: - Discuss the extent of the benefit (eg % reduction), and any evidence you may have to support that level of benefit - Discuss any examples where you have seen that benefit being demonstrated in smart meter pilot trials or roll-outs - Discuss any barriers that may need to be overcome before the benefit can be fully extracted from a smart meter system.) )

Please write your answer here:

746 []

747 From your experience/knowledge will water businesses benefit from digital water meters  
748 through increased value of assets (service connections), and to what extent?

749 **BACKGROUND:** Water companies do not normally treat as assets the main to property service  
750 connection even though they are responsible for the asset to and including the meter. The  
751 accurate location of the meter might be established as part of the digital metering rollout and  
752 enable these service connections to be recorded accurately as assets and valued.

753 \*

754 **Only answer this question if the following conditions are met:**

755 Answer was 'Yes' at question '29 [E1]' (Do you want to proceed to comment on potential benefits  
756 related to finances, tariffs and insurance costs? (For each suggested benefit, if possible, please  
757 include in the text boxes below an explanation for your opinion. Please try to cover some of the  
758 following aspects in your response: - Discuss the extent of the benefit (eg % reduction),and any  
759 evidence you may have to support that level of benefit - Discuss any examples where you have seen  
760 that benefit being demonstrated in smart meter pilot trials or roll-outs - Discuss any barriers that  
761 may need to be overcome before the benefit can be fully extracted from a smart meter system.) )

762 Please write your answer here:

763

764 []

765 From your experience/knowledge will water businesses benefit from digital water meters  
766 through improved demand forecasting and revenue projection, and to what extent?

767 **BACKGROUND:** Capturing hourly demand from digital water meters and using a range of  
768 statistical approaches may allow the water companies to better understand the usage patterns of  
769 water, its customer base, and to forecast future water usage and to project revenue.

770 \*

771 **Only answer this question if the following conditions are met:**

772 Answer was 'Yes' at question '29 [E1]' (Do you want to proceed to comment on potential benefits  
773 related to finances, tariffs and insurance costs? (For each suggested benefit, if possible, please  
774 include in the text boxes below an explanation for your opinion. Please try to cover some of the  
775 following aspects in your response: - Discuss the extent of the benefit (eg % reduction),and any  
776 evidence you may have to support that level of benefit - Discuss any examples where you have seen  
777 that benefit being demonstrated in smart meter pilot trials or roll-outs - Discuss any barriers that  
778 may need to be overcome before the benefit can be fully extracted from a smart meter system.) )

Please write your answer here:

□

**From your experience/knowledge will water businesses benefit from digital water meters through improved customer service/satisfaction through modified tariffs, and to what extent?**

**BACKGROUND: Digital water metering might allow tariffs to be modified to be based on time of day and day of week and so give customers greater choice and control over their costs.**

\*

**Only answer this question if the following conditions are met:**

Answer was 'Yes' at question '29 [E1]' (Do you want to proceed to comment on potential benefits related to finances, tariffs and insurance costs? (For each suggested benefit, if possible, please include in the text boxes below an explanation for your opinion. Please try to cover some of the following aspects in your response: - Discuss the extent of the benefit (eg % reduction), and any evidence you may have to support that level of benefit - Discuss any examples where you have seen that benefit being demonstrated in smart meter pilot trials or roll-outs - Discuss any barriers that may need to be overcome before the benefit can be fully extracted from a smart meter system.) )

Please write your answer here:

□

**From your experience/knowledge will water businesses benefit from digital water meters through a reduction in risk premium and working capital costs, and to what extent?**

**BACKGROUND: Working capital costs are required to cover near term expenses. More accurate timing of capital works based on digital metering data to eliminate non-revenue water and enable better forecasting might enable a reduction in both the risk premium employed and the working capital requirements.**

**Only answer this question if the following conditions are met:**

Answer was 'Yes' at question '29 [E1]' (Do you want to proceed to comment on potential benefits related to finances, tariffs and insurance costs? (For each suggested benefit, if possible, please include in the text boxes below an explanation for your opinion. Please try to cover some of the following aspects in your response: - Discuss the extent of the benefit (eg % reduction), and any evidence you may have to support that level of benefit - Discuss any examples where you have seen that benefit being demonstrated in smart meter pilot trials or roll-outs - Discuss any barriers that may need to be overcome before the benefit can be fully extracted from a smart meter system.) )

812 Please write your answer here:

813

814 []

815 From your experience/knowledge, will digital water metering reduce insurance claim incidents  
816 and costs from bursts and leaks, and to what extent?

817 **BACKGROUND:** Water companies may be able to reduce the insurance costs (premiums and  
818 excess payments for claims) through data from digital meters enabling earlier detection and  
819 preventative or earlier action on issues that lead to bursts and leaks and so avoid the full effects  
820 of water damage caused by main breaks.

821 \*

822 **Only answer this question if the following conditions are met:**

823 Answer was 'Yes' at question '29 [E1]' (Do you want to proceed to comment on potential benefits  
824 related to finances, tariffs and insurance costs? (For each suggested benefit, if possible, please  
825 include in the text boxes below an explanation for your opinion. Please try to cover some of the  
826 following aspects in your response: - Discuss the extent of the benefit (eg % reduction),and any  
827 evidence you may have to support that level of benefit - Discuss any examples where you have seen  
828 that benefit being demonstrated in smart meter pilot trials or roll-outs - Discuss any barriers that  
829 may need to be overcome before the benefit can be fully extracted from a smart meter system.) )

830 Please write your answer here:

831

832 **Engineering - operations**

833 This block of potential benefits covers the day to day operation of the water and sewer networks.

834 []

835 **Do you want to proceed to comment on the possible benefits to day to day operations of the water**  
836 **and sewer networks?**

837 **(For each suggested benefit, if possible, please include in the text boxes below an explanation for**  
838 **your opinion.**

839 **Please try to cover some of the following aspects in your response:**

840 **- Discuss the extent of the benefit (eg % reduction),and any evidence you may have to support**  
841 **that level of benefit**

842 **- Discuss any examples where you have seen that benefit being demonstrated in smart meter**

**pilot trials or roll-outs**

**- Discuss any barriers that may need to be overcome before the benefit can be fully extracted from a smart meter system.)**

\*

**Only answer this question if the following conditions are met:**

Answer was 'Yes' at question '1 [A2]' (Completion of this survey is voluntary and you may quit at any time. Your participation is anonymous. By completing this survey, you are giving your consent to participate in this study. Do you consent to participating and wish to proceed with this survey? ) and Answer was at question '8 [D0]' (Which blocks of potential benefits would you like to comment on? (Only questions in selected blocks will be presented.))

Please choose **only one** of the following:

- ☐ Yes
- ☐ No

[]

**From your experience/knowledge, will water business be able to gain a reduction in the wholesale cost of water, and to what extent?**

**BACKGROUND: Digital metering with associated data portal/communications may lead to greater customer awareness of their usage and, in turn, reduced customer demand and non-revenue water from leaks and bursts. The outcome from this water conservation could be reduced volume and cost of water from the wholesaler.**

\*

**Only answer this question if the following conditions are met:**

Answer was 'Yes' at question '39 [G1]' (Do you want to proceed to comment on the possible benefits to day to day operations of the water and sewer networks? (For each suggested benefit, if possible, please include in the text boxes below an explanation for your opinion. Please try to cover some of the following aspects in your response: - Discuss the extent of the benefit (eg % reduction), and any evidence you may have to support that level of benefit - Discuss any examples where you have seen that benefit being demonstrated in smart meter pilot trials or roll-outs - Discuss any barriers that may need to be overcome before the benefit can be fully extracted from a smart meter system.))

Please write your answer here:

[]

From your experience/knowledge, will water business be able to gain a reduction in water leaks and other NRW causes (eg. bursts), and to what extent?

**BACKGROUND:** With greater electronic coverage of the network and short interval data collection from bulk meters and digital water meters at properties, water companies may be able to establish District Metered Areas and calculate water balances to help identify leaks which, if undetected, might otherwise have become bursts.

\*

**Only answer this question if the following conditions are met:**

Answer was 'Yes' at question '39 [G1]' (Do you want to proceed to comment on the possible benefits to day to day operations of the water and sewer networks? (For each suggested benefit, if possible, please include in the text boxes below an explanation for your opinion. Please try to cover some of the following aspects in your response: - Discuss the extent of the benefit (eg % reduction), and any evidence you may have to support that level of benefit - Discuss any examples where you have seen that benefit being demonstrated in smart meter pilot trials or roll-outs - Discuss any barriers that may need to be overcome before the benefit can be fully extracted from a smart meter system.) )

Please write your answer here:

□

From your experience/knowledge, will water business be able to better manage peak water demand, and to what extent?

**BACKGROUND:** Hourly data capture could provide valuable information on diurnal and peak consumption patterns enabling better peak demand management.

\*

**Only answer this question if the following conditions are met:**

Answer was 'Yes' at question '39 [G1]' (Do you want to proceed to comment on the possible benefits to day to day operations of the water and sewer networks? (For each suggested benefit, if possible, please include in the text boxes below an explanation for your opinion. Please try to cover some of the following aspects in your response: - Discuss the extent of the benefit (eg % reduction), and any evidence you may have to support that level of benefit - Discuss any examples where you have seen that benefit being demonstrated in smart meter pilot trials or roll-outs - Discuss any barriers that may need to be overcome before the benefit can be fully extracted from a smart meter system.) )

Please write your answer here:

908 []

909 From your experience/knowledge, will water business be able to gain a reduction in water  
910 pumping cost (GHG emissions), and to what extent?

911 **BACKGROUND:** Digital water metering may lead to a reduction in demand and so reduce the  
912 need for water pumping around the network.

913 \*

914 **Only answer this question if the following conditions are met:**

915 Answer was 'Yes' at question '39 [G1]' (Do you want to proceed to comment on the possible benefits  
916 to day to day operations of the water and sewer networks? (For each suggested benefit, if possible,  
917 please include in the text boxes below an explanation for your opinion. Please try to cover some of  
918 the following aspects in your response: - Discuss the extent of the benefit (eg % reduction),and any  
919 evidence you may have to support that level of benefit - Discuss any examples where you have seen  
920 that benefit being demonstrated in smart meter pilot trials or roll-outs - Discuss any barriers that  
921 may need to be overcome before the benefit can be fully extracted from a smart meter system.) )

922 Please write your answer here:

923

924 []

925 From your experience/knowledge, will water business be able to gain a improved forecasting of  
926 sewer flows, and to what extent?

927 **BACKGROUND:** With hourly measured water usage through digital metering at each property,  
928 the sewer flows could be better forecast by time of day. These forecasts could be fed into waste  
929 water modelling tools. The impact of any water tanks on the properties and internal use of the  
930 harvested water may be able to be built into the model.

931 \*

932 **Only answer this question if the following conditions are met:**

933 Answer was 'Yes' at question '39 [G1]' (Do you want to proceed to comment on the possible benefits  
934 to day to day operations of the water and sewer networks? (For each suggested benefit, if possible,  
935 please include in the text boxes below an explanation for your opinion. Please try to cover some of  
936 the following aspects in your response: - Discuss the extent of the benefit (eg % reduction),and any  
937 evidence you may have to support that level of benefit - Discuss any examples where you have seen  
938 that benefit being demonstrated in smart meter pilot trials or roll-outs - Discuss any barriers that  
939 may need to be overcome before the benefit can be fully extracted from a smart meter system.) )

940 Please write your answer here:

941

942 []

943 From your experience/knowledge, will water business be able to gain a reduction in audits  
944 required (through targeted SWM water quality testing), and to what extent?

945 **BACKGROUND:** As part of the establishment of the AMR, separate water quality sensing  
946 devices or multi-purpose digital meters may be established to automate some water quality  
947 monitoring or corrective actions. For example, data analytics of complaints and actual hourly  
948 demand readings may help establish better chlorine dosing levels by time of day and day of  
949 week.

950 \*

951 **Only answer this question if the following conditions are met:**

952 Answer was 'Yes' at question '39 [G1]' (Do you want to proceed to comment on the possible benefits  
953 to day to day operations of the water and sewer networks? (For each suggested benefit, if possible,  
954 please include in the text boxes below an explanation for your opinion. Please try to cover some of  
955 the following aspects in your response: - Discuss the extent of the benefit (eg % reduction),and any  
956 evidence you may have to support that level of benefit - Discuss any examples where you have seen  
957 that benefit being demonstrated in smart meter pilot trials or roll-outs - Discuss any barriers that  
958 may need to be overcome before the benefit can be fully extracted from a smart meter system.) )

959 Please write your answer here:

960

961 **Engineering - planning**

962 This block of potential benefits covers planning of the water network.

963 []

964 Do you want to proceed to comment on possible benefits to planning of the water network?

965 (For each suggested benefit, if possible, please include in the text boxes below an explanation for  
966 your opinion.

967 Please try to cover some of the following aspects in your response:

968 - Discuss the extent of the benefit (eg % reduction),and any evidence you may have to support  
969 that level of benefit

970 - Discuss any examples where you have seen that benefit being demonstrated in smart meter  
971 pilot trials or roll-outs

972 - Discuss any barriers that may need to be overcome before the benefit can be fully extracted  
973 from a smart meter system.)

974 \*

975 **Only answer this question if the following conditions are met:**

976 Answer was 'Yes' at question '1 [A2]' (Completion of this survey is voluntary and you may quit at  
977 any time. Your participation is anonymous. By completing this survey, you are giving your consent  
978 to participate in this study. Do you consent to participating and wish to proceed with this survey? )  
979 and Answer was at question '8 [D0]' (Which blocks of potential benefits would you like to comment  
980 on? (Only questions in selected blocks will be presented.))

981 Please choose **only one** of the following:

- 982 • ☐ Yes  
983 • ☐ No

984 []

985 **From your experience/knowledge, will water business be able to improve network planning, and**  
986 **to what extent?**

987 **BACKGROUND: The increase in demand data available from digital water metering coupled**  
988 **with future land development plans may enable improvements to hydraulic modelling with**  
989 **more accurate development timing.**

990 \*

991 **Only answer this question if the following conditions are met:**

992 Answer was 'Yes' at question '46 [H1]' (Do you want to proceed to comment on possible benefits to  
993 planning of the water network? (For each suggested benefit, if possible, please include in the text  
994 boxes below an explanation for your opinion. Please try to cover some of the following aspects in  
995 your response: - Discuss the extent of the benefit (eg % reduction), and any evidence you may have to  
996 support that level of benefit - Discuss any examples where you have seen that benefit being  
997 demonstrated in smart meter pilot trials or roll-outs - Discuss any barriers that may need to be  
998 overcome before the benefit can be fully extracted from a smart meter system.) )

999 Please write your answer here:

1000

1001 []

1002 **From your experience/knowledge, will water business be able to defer network augmentation,**  
1003 **and to what extent?**

**BACKGROUND:** Actions arising from digital metering such as reduction in demand through network non-revenue water, in-property leaks and more awareness of water use could enable the deferral of network augmentation works including pipe upgrades, pumping upgrades and waste water processing plants.

\*

**Only answer this question if the following conditions are met:**

Answer was 'Yes' at question '46 [H1]' (Do you want to proceed to comment on possible benefits to planning of the water network? (For each suggested benefit, if possible, please include in the text boxes below an explanation for your opinion. Please try to cover some of the following aspects in your response: - Discuss the extent of the benefit (eg % reduction), and any evidence you may have to support that level of benefit - Discuss any examples where you have seen that benefit being demonstrated in smart meter pilot trials or roll-outs - Discuss any barriers that may need to be overcome before the benefit can be fully extracted from a smart meter system.) )

Please write your answer here:

□

**From your experience/knowledge, will engineering planners of water business be able to reduce uncertainty and risk margin used in planning, and to what extent?**

**BACKGROUND:** The access to vastly increased water demand data recorded by digital water meters at relatively short intervals could enable planners to more precisely know demand in different areas of the network under various circumstances and conditions. This could reduce the uncertainty in planning the operation and augmentation of the network. The risk margin might be reduced.

\*

**Only answer this question if the following conditions are met:**

Answer was 'Yes' at question '46 [H1]' (Do you want to proceed to comment on possible benefits to planning of the water network? (For each suggested benefit, if possible, please include in the text boxes below an explanation for your opinion. Please try to cover some of the following aspects in your response: - Discuss the extent of the benefit (eg % reduction), and any evidence you may have to support that level of benefit - Discuss any examples where you have seen that benefit being demonstrated in smart meter pilot trials or roll-outs - Discuss any barriers that may need to be overcome before the benefit can be fully extracted from a smart meter system.) )

Please write your answer here:

1038 **Knowledge of customer demand for planning**

1039 This block of potential benefits covers planning issues related to new knowledge of customer  
1040 demand patterns and water use.

1041 []

1042 **Do you want to proceed to comment on possible benefits relating to new knowledge of**  
1043 **customers' water demand patterns and use?**

1044 **(For each suggested benefit, if possible, please include in the text boxes below an explanation for**  
1045 **your opinion.**

1046 **Please try to cover some of the following aspects in your response:**

- 1047 - Discuss the extent of the benefit (eg % reduction), and any evidence you may have to support
- 1048 that level of benefit
- 1049 - Discuss any examples where you have seen that benefit being demonstrated in smart meter
- 1050 pilot trials or roll-outs
- 1051 - Discuss any barriers that may need to be overcome before the benefit can be fully extracted
- 1052 from a smart meter system.)

1053 \*

1054 **Only answer this question if the following conditions are met:**

1055 Answer was 'Yes' at question '1 [A2]' (Completion of this survey is voluntary and you may quit at  
1056 any time. Your participation is anonymous. By completing this survey, you are giving your consent  
1057 to participate in this study. Do you consent to participating and wish to proceed with this survey? )  
1058 and Answer was at question '8 [D0]' (Which blocks of potential benefits would you like to comment  
1059 on? (Only questions in selected blocks will be presented.))

1060 Please choose **only one** of the following:

- 1061 • ☐ Yes
- 1062 • ☐ No

1063 []

1064 **From your experience/knowledge, will water business gain new knowledge of each**  
1065 **non-residential customer's property use, and to what extent?**

1066 **BACKGROUND:** Compared to residential customers there is, generally, little knowledge about  
1067 demand profiles of commercial, industrial and other non-residential customers. While doing a  
1068 rollout of digital meters the opportunity exists to record the property use (business type) to help  
1069 facilitate the data analytics and benchmarking of non-residential customers. While normal digital  
1070 metering may be set at hourly reading intervals, statistical sampling within business types of

1071 even higher frequency readings for short durations could be undertaken to establish demand  
1072 patterns and end-use studies.

1073 \*

1074 **Only answer this question if the following conditions are met:**

1075 Answer was 'Yes' at question '50 [J1]' (Do you want to proceed to comment on possible benefits  
1076 relating to new knowledge of customers' water demand patterns and use? (For each suggested  
1077 benefit, if possible, please include in the text boxes below an explanation for your opinion. Please try  
1078 to cover some of the following aspects in your response: - Discuss the extent of the benefit (eg %  
1079 reduction),and any evidence you may have to support that level of benefit - Discuss any examples  
1080 where you have seen that benefit being demonstrated in smart meter pilot trials or roll-outs - Discuss  
1081 any barriers that may need to be overcome before the benefit can be fully extracted from a smart  
1082 meter system.) )

1083 Please write your answer here:

1084

1085 []

1086 **From your experience/knowledge, will water business gain from new knowledge of tourism**  
1087 **impacts for tourist regions (seasonal/event), and to what extent?**

1088 **BACKGROUND: Tourist precincts have individual water use patterns that change by season and**  
1089 **local events. It is suggested that by capturing and using hourly meter reading data, these patterns**  
1090 **might be better understood and water use planned for in the future.**

1091 \*

1092 **Only answer this question if the following conditions are met:**

1093 Answer was 'Yes' at question '50 [J1]' (Do you want to proceed to comment on possible benefits  
1094 relating to new knowledge of customers' water demand patterns and use? (For each suggested  
1095 benefit, if possible, please include in the text boxes below an explanation for your opinion. Please try  
1096 to cover some of the following aspects in your response: - Discuss the extent of the benefit (eg %  
1097 reduction),and any evidence you may have to support that level of benefit - Discuss any examples  
1098 where you have seen that benefit being demonstrated in smart meter pilot trials or roll-outs - Discuss  
1099 any barriers that may need to be overcome before the benefit can be fully extracted from a smart  
1100 meter system.) )

1101 Please write your answer here:

1102

1103 []

1104 From your experience/knowledge, will water business be able to understand time-of-day use by  
1105 customer segment, and to what extent?

1106 **BACKGROUND:** Hourly readings from digital water meters could provide an opportunity to  
1107 develop demand patterns for each customer segment. This could be valuable when undertaking  
1108 planning, meter sizing and benchmarking studies.

1109 \*

1110 **Only answer this question if the following conditions are met:**

1111 Answer was 'Yes' at question '50 [J1]' (Do you want to proceed to comment on possible benefits  
1112 relating to new knowledge of customers' water demand patterns and use? (For each suggested  
1113 benefit, if possible, please include in the text boxes below an explanation for your opinion. Please try  
1114 to cover some of the following aspects in your response: - Discuss the extent of the benefit (eg %  
1115 reduction),and any evidence you may have to support that level of benefit - Discuss any examples  
1116 where you have seen that benefit being demonstrated in smart meter pilot trials or roll-outs - Discuss  
1117 any barriers that may need to be overcome before the benefit can be fully extracted from a smart  
1118 meter system.) )

1119 Please write your answer here:

1120

1121 []

1122 From your experience/knowledge, will water business be able to develop diurnal curves for  
1123 non-residential customers by customer type (micro segmentation), and to what extent?

1124 **BACKGROUND:** Based on the ANZSIC (Australian and New Zealand Standard Industrial  
1125 Classification) and AVPCC (Australian Valuation Property Classification Code) code there is an  
1126 extensive range of business types. Some could be grouped into common demand patterns (eg.  
1127 Commercial office based businesses). Digital metering could provide an opportunity to establish  
1128 diurnal curves for different business types and for sub-business types (eg supermarkets with  
1129 limited hours and those open 24x7).

1130 \*

1131 **Only answer this question if the following conditions are met:**

1132 Answer was 'Yes' at question '50 [J1]' (Do you want to proceed to comment on possible benefits  
1133 relating to new knowledge of customers' water demand patterns and use? (For each suggested  
1134 benefit, if possible, please include in the text boxes below an explanation for your opinion. Please try  
1135 to cover some of the following aspects in your response: - Discuss the extent of the benefit (eg %  
1136 reduction),and any evidence you may have to support that level of benefit - Discuss any examples  
1137 where you have seen that benefit being demonstrated in smart meter pilot trials or roll-outs - Discuss

1138 any barriers that may need to be overcome before the benefit can be fully extracted from a smart  
1139 meter system.) )

1140 Please write your answer here:

1141

1142 []

1143 From your experience/knowledge, will water business be able to develop diurnal curves for  
1144 high-rise buildings and multi-unit properties, and to what extent?

1145 **BACKGROUND:** High-rise and multi-unit developments are special customer groupings and  
1146 may have different demand profiles based on the numbers of residential units and the  
1147 commercial businesses within the complex and the common areas that are not sub-metered. Data  
1148 from digital water metering of properties within the complexes may be able to be used to develop  
1149 curves for high-rise and multi-unit properties.

1150 \*

1151 Only answer this question if the following conditions are met:

1152 Answer was 'Yes' at question '50 [J1]' (Do you want to proceed to comment on possible benefits  
1153 relating to new knowledge of customers' water demand patterns and use? (For each suggested  
1154 benefit, if possible, please include in the text boxes below an explanation for your opinion. Please try  
1155 to cover some of the following aspects in your response: - Discuss the extent of the benefit (eg %  
1156 reduction), and any evidence you may have to support that level of benefit - Discuss any examples  
1157 where you have seen that benefit being demonstrated in smart meter pilot trials or roll-outs - Discuss  
1158 any barriers that may need to be overcome before the benefit can be fully extracted from a smart  
1159 meter system.) )

1160 Please write your answer here:

1161

1162 []

1163 From your experience/knowledge, will water business be able to develop reverse modelling of  
1164 household characteristics via the demand pattern, and to what extent?

1165 **BACKGROUND:** It is suggested that household size, irrigation use, presence of water tank and  
1166 evaporative cooler use might be able to be modelled using demand patterns gained from hourly  
1167 usage data across seasons using reverse modelling from previous end-use studies.

1168 \*

**Only answer this question if the following conditions are met:**

Answer was 'Yes' at question '50 [J1]' (Do you want to proceed to comment on possible benefits relating to new knowledge of customers' water demand patterns and use? (For each suggested benefit, if possible, please include in the text boxes below an explanation for your opinion. Please try to cover some of the following aspects in your response: - Discuss the extent of the benefit (eg % reduction), and any evidence you may have to support that level of benefit - Discuss any examples where you have seen that benefit being demonstrated in smart meter pilot trials or roll-outs - Discuss any barriers that may need to be overcome before the benefit can be fully extracted from a smart meter system.) )

Please write your answer here:

□

**From your experience/knowledge, will water business be able to gain new knowledge of the impact of appliance efficiency on total demand, and to what extent?**

**BACKGROUND:** Historical disaggregated end-use models might be able to be employed with digital metered properties to provide sufficient data to enable the efficiency of appliances to be measured. Long term trending of appliance efficiency and its impact on total demand might be able to be modelled from this data.

\*

**Only answer this question if the following conditions are met:**

Answer was 'Yes' at question '50 [J1]' (Do you want to proceed to comment on possible benefits relating to new knowledge of customers' water demand patterns and use? (For each suggested benefit, if possible, please include in the text boxes below an explanation for your opinion. Please try to cover some of the following aspects in your response: - Discuss the extent of the benefit (eg % reduction), and any evidence you may have to support that level of benefit - Discuss any examples where you have seen that benefit being demonstrated in smart meter pilot trials or roll-outs - Discuss any barriers that may need to be overcome before the benefit can be fully extracted from a smart meter system.) )

Please write your answer here:

□

**From your experience/knowledge, will water business be able to develop benchmarks for customer segments, and to what extent?**

**BACKGROUND:** Customers within segments may have similar usage patterns. Using data from simultaneous hourly digital metering there is a possibility that they could be benchmarked. The individual customers within segments could then be compared to the benchmarks.

\*

**Only answer this question if the following conditions are met:**

Answer was 'Yes' at question '50 [J1]' (Do you want to proceed to comment on possible benefits relating to new knowledge of customers' water demand patterns and use? (For each suggested benefit, if possible, please include in the text boxes below an explanation for your opinion. Please try to cover some of the following aspects in your response: - Discuss the extent of the benefit (eg % reduction),and any evidence you may have to support that level of benefit - Discuss any examples where you have seen that benefit being demonstrated in smart meter pilot trials or roll-outs - Discuss any barriers that may need to be overcome before the benefit can be fully extracted from a smart meter system.) )

Please write your answer here:

**Customer water efficiency**

This block of potential benefits covers customers' water efficiency.

[]

**Do you want to proceed to comment on possible benefits to customers' water efficiency?**

**(For each suggested benefit, if possible, please include in the text boxes below an explanation for your opinion.**

**Please try to cover some of the following aspects in your response:**

**- Discuss the extent of the benefit (eg % reduction),and any evidence you may have to support that level of benefit**

**- Discuss any examples where you have seen that benefit being demonstrated in smart meter pilot trials or roll-outs**

**- Discuss any barriers that may need to be overcome before the benefit can be fully extracted from a smart meter system.)**

\*

**Only answer this question if the following conditions are met:**

Answer was 'Yes' at question '1 [A2]' (Completion of this survey is voluntary and you may quit at any time. Your participation is anonymous. By completing this survey, you are giving your consent to participate in this study. Do you consent to participating and wish to proceed with this survey? )

1235 and Answer was at question '8 [D0]' (Which blocks of potential benefits would you like to comment  
1236 on? (Only questions in selected blocks will be presented.))

1237 Please choose **only one** of the following:

- 1238 • ☐ Yes  
1239 • ☐ No

1240 []

1241 From your experience/knowledge, will customers be able to reduce costs by being alerted to leaks  
1242 at their property, and to what extent?

1243 **BACKGROUND:** Early detection of leaks at properties and alerting the customer may be enabled  
1244 by digital water metering and might significantly reduce the time that leaks run before repair and  
1245 therefore reduce the cost impact on customers.

1246 \*

1247 **Only answer this question if the following conditions are met:**

1248 Answer was 'Yes' at question '59 [K1]' (Do you want to proceed to comment on possible benefits to  
1249 customers' water efficiency? (For each suggested benefit, if possible, please include in the text boxes  
1250 below an explanation for your opinion. Please try to cover some of the following aspects in your  
1251 response: - Discuss the extent of the benefit (eg % reduction), and any evidence you may have to  
1252 support that level of benefit - Discuss any examples where you have seen that benefit being  
1253 demonstrated in smart meter pilot trials or roll-outs - Discuss any barriers that may need to be  
1254 overcome before the benefit can be fully extracted from a smart meter system.) )

1255 Please write your answer here:

1256

1257 []

1258 From your experience/knowledge, will customers be able to reduce their water use through  
1259 awareness and education, and to what extent?

1260 **BACKGROUND:** Providing customers ready access to their water usage through an online portal  
1261 could provide them with opportunities to modify their water demand.

1262 \*

1263 **Only answer this question if the following conditions are met:**

1264 Answer was 'Yes' at question '59 [K1]' (Do you want to proceed to comment on possible benefits to  
1265 customers' water efficiency? (For each suggested benefit, if possible, please include in the text boxes

below an explanation for your opinion. Please try to cover some of the following aspects in your response: - Discuss the extent of the benefit (eg % reduction),and any evidence you may have to support that level of benefit - Discuss any examples where you have seen that benefit being demonstrated in smart meter pilot trials or roll-outs - Discuss any barriers that may need to be overcome before the benefit can be fully extracted from a smart meter system.) )

Please write your answer here:

[]

**From your experience/knowledge, will customers be able to be more water efficient and reduce their bill through bill prediction, and to what extent?**

**BACKGROUND:** Systems and processes that use forecasting techniques could be set up to provide customers to a portal that could include a bill prediction based on previous usage patterns and billing period-to-date from digital water metering.

\*

**Only answer this question if the following conditions are met:**

Answer was 'Yes' at question '59 [K1]' (Do you want to proceed to comment on possible benefits to customers' water efficiency? (For each suggested benefit, if possible, please include in the text boxes below an explanation for your opinion. Please try to cover some of the following aspects in your response: - Discuss the extent of the benefit (eg % reduction),and any evidence you may have to support that level of benefit - Discuss any examples where you have seen that benefit being demonstrated in smart meter pilot trials or roll-outs - Discuss any barriers that may need to be overcome before the benefit can be fully extracted from a smart meter system.) )

Please write your answer here:

[]

**From your experience/knowledge, will customers be able to be more water efficient and reduce costs through monthly billing, and to what extent?**

**BACKGROUND:** Monthly billing would provide earlier feedback to customers on their recent usage to which they could react to control their use.

\*

**Only answer this question if the following conditions are met:**

Answer was 'Yes' at question '59 [K1]' (Do you want to proceed to comment on possible benefits to customers' water efficiency? (For each suggested benefit, if possible, please include in the text boxes below an explanation for your opinion. Please try to cover some of the following aspects in your response: - Discuss the extent of the benefit (eg % reduction), and any evidence you may have to support that level of benefit - Discuss any examples where you have seen that benefit being demonstrated in smart meter pilot trials or roll-outs - Discuss any barriers that may need to be overcome before the benefit can be fully extracted from a smart meter system.) )

Please write your answer here:

**Customer complaints and assistance**

**This block of potential benefits relate to customer complaints, complaint resolution, assistance programs and insurance claims from concealed leaks.**

**[]**

**Do you want to comment on possible benefits from digital water metering on issues of complaints and assistance?**

**(For each suggested benefit, if possible, please include in the text boxes below an explanation for your opinion.**

**Please try to cover some of the following aspects in your response:**

**- Discuss the extent of the benefit (eg % reduction), and any evidence you may have to support that level of benefit**

**- Discuss any examples where you have seen that benefit being demonstrated in smart meter pilot trials or roll-outs**

**- Discuss any barriers that may need to be overcome before the benefit can be fully extracted from a smart meter system.)**

**\***

**Only answer this question if the following conditions are met:**

Answer was 'Yes' at question '1 [A2]' (Completion of this survey is voluntary and you may quit at any time. Your participation is anonymous. By completing this survey, you are giving your consent to participate in this study. Do you consent to participating and wish to proceed with this survey? ) and Answer was at question '8 [D0]' (Which blocks of potential benefits would you like to comment on? (Only questions in selected blocks will be presented.))

Please choose **only one** of the following:

- 1329 • ☐ Yes  
1330 • ☐ No

1331 []

1332 From your experience/knowledge, will digital water metering lead to reduced customer billing  
1333 complaints, and to what extent?

1334 **BACKGROUND:** Billing complaints such as high-bills, estimated reads and mis-reads could be  
1335 reduced if customers are provided with access to greater information about their water usage. In  
1336 particular, if they are alerted to leaks early and if they could access an online portal for hourly or  
1337 daily usage records from digital water meters.

1338 \*

1339 **Only answer this question if the following conditions are met:**

1340 Answer was 'Yes' at question '64 [L1]' (Do you want to comment on possible benefits from digital  
1341 water metering on issues of complaints and assistance? (For each suggested benefit, if possible,  
1342 please include in the text boxes below an explanation for your opinion. Please try to cover some of  
1343 the following aspects in your response: - Discuss the extent of the benefit (eg % reduction), and any  
1344 evidence you may have to support that level of benefit - Discuss any examples where you have seen  
1345 that benefit being demonstrated in smart meter pilot trials or roll-outs - Discuss any barriers that  
1346 may need to be overcome before the benefit can be fully extracted from a smart meter system.) )

1347 Please write your answer here:

1348

1349 []

1350 From your experience/knowledge, will digital water metering lead to reduced external costs of  
1351 Ombudsman (eg. EWOV) referred complaints, and to what extent?

1352 **BACKGROUND:** Water Ombudsman (for example, the Victorian Ombudsman) charges water  
1353 companies a fixed annual fee based on the companies number of customers and a processing fee  
1354 per complaint based on the effort to resolve the issue. Digital water metering may reduce the  
1355 number of complaints referred to the Ombudsman and so could in turn reduce the costs to the  
1356 water company.

1357 \*

1358 **Only answer this question if the following conditions are met:**

1359 Answer was 'Yes' at question '64 [L1]' (Do you want to comment on possible benefits from digital  
1360 water metering on issues of complaints and assistance? (For each suggested benefit, if possible,  
1361 please include in the text boxes below an explanation for your opinion. Please try to cover some of

the following aspects in your response: - Discuss the extent of the benefit (eg % reduction),and any evidence you may have to support that level of benefit - Discuss any examples where you have seen that benefit being demonstrated in smart meter pilot trials or roll-outs - Discuss any barriers that may need to be overcome before the benefit can be fully extracted from a smart meter system.) )

Please write your answer here:

□

**From your experience/knowledge, will digital water metering lead to reduced internal costs of Ombudsman (eg. EWOV) referred complaints, and to what extent?**

**BACKGROUND:** Considerable water company staff time and therefore costs may be incurred when complaints are referred to the Ombudsman. Many billing complaints centre around billing issues are unresolved and referred to the Ombudsman. Billing complaints may be reduced through digital metering eliminating such issues as reading errors, estimated reads and concealed leak high-bills and could be expected to reduce the billing complaints presented to the Ombudsman and therefore internal costs.

\*

**Only answer this question if the following conditions are met:**

Answer was 'Yes' at question '64 [L1]' (Do you want to comment on possible benefits from digital water metering on issues of complaints and assistance? (For each suggested benefit, if possible, please include in the text boxes below an explanation for your opinion. Please try to cover some of the following aspects in your response: - Discuss the extent of the benefit (eg % reduction),and any evidence you may have to support that level of benefit - Discuss any examples where you have seen that benefit being demonstrated in smart meter pilot trials or roll-outs - Discuss any barriers that may need to be overcome before the benefit can be fully extracted from a smart meter system.) )

Please write your answer here:

□

**From your experience/knowledge, will digital water metering lead to improved outcomes from billing disputes, and to what extent?**

**BACKGROUND:** With more data to draw on from digital water metering and customer self service through a portal it is suggested that billing disputes could be avoided and if they do occur they could be resolved more quickly and amicably.

1394 \*

1395 **Only answer this question if the following conditions are met:**

1396 Answer was 'Yes' at question '64 [L1]' (Do you want to comment on possible benefits from digital  
1397 water metering on issues of complaints and assistance? (For each suggested benefit, if possible,  
1398 please include in the text boxes below an explanation for your opinion. Please try to cover some of  
1399 the following aspects in your response: - Discuss the extent of the benefit (eg % reduction),and any  
1400 evidence you may have to support that level of benefit - Discuss any examples where you have seen  
1401 that benefit being demonstrated in smart meter pilot trials or roll-outs - Discuss any barriers that  
1402 may need to be overcome before the benefit can be fully extracted from a smart meter system.) )

1403 Please write your answer here:

1404

1405 []

1406 **From your experience/knowledge, will digital water metering lead to reduced HULA (High**  
1407 **Usage Leak Allowance) costs from concealed leaks, and to what extent?**

1408 **BACKGROUND:** Quarterly billing means that concealed leaks at properties can run for long  
1409 periods before the customer becomes aware of the issue through a high usage and bill. Water  
1410 companies' customer assistance programs for concealed leaks may be limited to the time when  
1411 the customer contacts the water company about their high usage/bill. Earlier alerting of  
1412 customers to possible leaks at their property (based on data from digital water metering) could  
1413 significantly reduce the water company's assistance cost (through their HULA program) .

1414 \*

1415 **Only answer this question if the following conditions are met:**

1416 Answer was 'Yes' at question '64 [L1]' (Do you want to comment on possible benefits from digital  
1417 water metering on issues of complaints and assistance? (For each suggested benefit, if possible,  
1418 please include in the text boxes below an explanation for your opinion. Please try to cover some of  
1419 the following aspects in your response: - Discuss the extent of the benefit (eg % reduction),and any  
1420 evidence you may have to support that level of benefit - Discuss any examples where you have seen  
1421 that benefit being demonstrated in smart meter pilot trials or roll-outs - Discuss any barriers that  
1422 may need to be overcome before the benefit can be fully extracted from a smart meter system.) )

1423 Please write your answer here:

1424

1425 []

1426 From your experience/knowledge, will digital water metering lead to reduced plumbing  
1427 assistance costs, and to what extent?

1428 **BACKGROUND:** Some water companies run plumbing assistance programs to provide  
1429 disadvantaged customers with access to funds to repair and replace water appliances. Early  
1430 detection of issues based on digital water metering data may reduce the extent of the problem  
1431 and therefore the assistance expense per customer allowing more customers to be assisted within  
1432 program budgets.

1433 \*

1434 **Only answer this question if the following conditions are met:**

1435 Answer was 'Yes' at question '64 [L1]' (Do you want to comment on possible benefits from digital  
1436 water metering on issues of complaints and assistance? (For each suggested benefit, if possible,  
1437 please include in the text boxes below an explanation for your opinion. Please try to cover some of  
1438 the following aspects in your response: - Discuss the extent of the benefit (eg % reduction),and any  
1439 evidence you may have to support that level of benefit - Discuss any examples where you have seen  
1440 that benefit being demonstrated in smart meter pilot trials or roll-outs - Discuss any barriers that  
1441 may need to be overcome before the benefit can be fully extracted from a smart meter system.) )

1442 Please write your answer here:

1443

1444 []

1445 From your experience/knowledge, will digital water metering lead to reduced contact centre calls,  
1446 and to what extent?

1447 **BACKGROUND:** Customers with an online account portal in which they can see their water  
1448 usage are more likely to visit that site to resolve their billing enquiry as they have 24x7 access to  
1449 the portal to avoid having to wait until business hours to call and then getting caught in  
1450 telephone wait queues and telephone IVR systems.

1451 \*

1452 **Only answer this question if the following conditions are met:**

1453 Answer was 'Yes' at question '64 [L1]' (Do you want to comment on possible benefits from digital  
1454 water metering on issues of complaints and assistance? (For each suggested benefit, if possible,  
1455 please include in the text boxes below an explanation for your opinion. Please try to cover some of  
1456 the following aspects in your response: - Discuss the extent of the benefit (eg % reduction),and any  
1457 evidence you may have to support that level of benefit - Discuss any examples where you have seen  
1458 that benefit being demonstrated in smart meter pilot trials or roll-outs - Discuss any barriers that  
1459 may need to be overcome before the benefit can be fully extracted from a smart meter system.) )

1460 Please write your answer here:

1461

1462 []

1463 From your experience/knowledge, will digital water metering lead to a reduction in insurance  
1464 claims by customers, and to what extent?

1465 **BACKGROUND:** Customers' insurance claims involving water use include water theft from  
1466 behind the meter and damage to properties caused by concealed leaks. Digital metering could  
1467 help to reduce these claims through early detection of anomalous water use patterns, access to  
1468 data through a portal, bill prediction and customer set alerting rules.

1469 \*

1470 **Only answer this question if the following conditions are met:**

1471 Answer was 'Yes' at question '64 [L1]' (Do you want to comment on possible benefits from digital  
1472 water metering on issues of complaints and assistance? (For each suggested benefit, if possible,  
1473 please include in the text boxes below an explanation for your opinion. Please try to cover some of  
1474 the following aspects in your response: - Discuss the extent of the benefit (eg % reduction),and any  
1475 evidence you may have to support that level of benefit - Discuss any examples where you have seen  
1476 that benefit being demonstrated in smart meter pilot trials or roll-outs - Discuss any barriers that  
1477 may need to be overcome before the benefit can be fully extracted from a smart meter system.) )

1478 Please write your answer here:

1479

1480 []

1481 From your experience/knowledge, will digital water metering lead to fewer visits to the property  
1482 and therefore to increased security for home and business owners, and to what extent?

1483 **BACKGROUND:** Automated meter reading could, as well as eliminating safety issues for water  
1484 company employees, mean that home and business owners are safer as they do not have to enable  
1485 ready access to their private property (ie. through key safes, unlocked premises, key-codes, etc)  
1486 for meter readers to read the meter.

1487 \*

1488 **Only answer this question if the following conditions are met:**

1489 Answer was 'Yes' at question ' [M1]' (Do you want to comment on the possible benefits of customer  
1490 communications from digital water metering? (For each suggested benefit, if possible, please include  
1491 in the text boxes below an explanation for your opinion. Please try to cover some of the following

aspects in your response: - Discuss the extent of the benefit (eg % reduction),and any evidence you may have to support that level of benefit - Discuss any examples where you have seen that benefit being demonstrated in smart meter pilot trials or roll-outs - Discuss any barriers that may need to be overcome before the benefit can be fully extracted from a smart meter system.) )

Please write your answer here:

### **Customer communication**

This block of potential benefits covers enhanced communication to customers.

□

**Do you want to comment on the possible benefits of customer communications from digital water metering?**

**(For each suggested benefit, if possible, please include in the text boxes below an explanation for your opinion.**

**Please try to cover some of the following aspects in your response:**

**- Discuss the extent of the benefit (eg % reduction),and any evidence you may have to support that level of benefit**

**- Discuss any examples where you have seen that benefit being demonstrated in smart meter pilot trials or roll-outs**

**- Discuss any barriers that may need to be overcome before the benefit can be fully extracted from a smart meter system.)**

\*

**Only answer this question if the following conditions are met:**

Answer was 'Yes' at question '1 [A2]' (Completion of this survey is voluntary and you may quit at any time. Your participation is anonymous. By completing this survey, you are giving your consent to participate in this study. Do you consent to participating and wish to proceed with this survey? ) and Answer was at question '8 [D0]' (Which blocks of potential benefits would you like to comment on? (Only questions in selected blocks will be presented.))

Please choose **only one** of the following:

• ☐ Yes

• ☐ No

□

1523 From your experience/knowledge, will digital water metering lead to enhanced communications,  
1524 and to what extent?

1525 **BACKGROUND:** With more data of a customer's usage available, water companies might be able  
1526 to provide more detailed information on bills and through an account portal.

1527 \*

1528 **Only answer this question if the following conditions are met:**

1529 Answer was 'Yes' at question '74 [M1]' (Do you want to comment on the possible benefits of  
1530 customer communications from digital water metering? (For each suggested benefit, if possible,  
1531 please include in the text boxes below an explanation for your opinion. Please try to cover some of  
1532 the following aspects in your response: - Discuss the extent of the benefit (eg % reduction),and any  
1533 evidence you may have to support that level of benefit - Discuss any examples where you have seen  
1534 that benefit being demonstrated in smart meter pilot trials or roll-outs - Discuss any barriers that  
1535 may need to be overcome before the benefit can be fully extracted from a smart meter system.) )

1536 Please write your answer here:

1537

1538 []

1539 From your experience/knowledge, will digital water metering enable water companies to provide  
1540 a service to non-residential and residential customers for disaggregated/appliance end use, and to  
1541 what extent?

1542 **BACKGROUND:** High frequency digital metering studies has led to tools for disaggregating  
1543 water usage into end-use even when multiple appliances are applied. Based on these studies the  
1544 algorithms provide an opportunity for customer portals to also provide a disaggregated end-use  
1545 analysis from hourly interval metered use data. This might be particularly useful to some  
1546 non-residential users who would otherwise need to sub-meter their business to monitor the  
1547 water efficiency of particular processes.

1548 \*

1549 **Only answer this question if the following conditions are met:**

1550 Answer was 'Yes' at question '74 [M1]' (Do you want to comment on the possible benefits of  
1551 customer communications from digital water metering? (For each suggested benefit, if possible,  
1552 please include in the text boxes below an explanation for your opinion. Please try to cover some of  
1553 the following aspects in your response: - Discuss the extent of the benefit (eg % reduction),and any  
1554 evidence you may have to support that level of benefit - Discuss any examples where you have seen  
1555 that benefit being demonstrated in smart meter pilot trials or roll-outs - Discuss any barriers that  
1556 may need to be overcome before the benefit can be fully extracted from a smart meter system.) )

1557 Please write your answer here:

1558

1559 []

1560 From your experience/knowledge, will digital water metering lead to integration of smart meters  
1561 with "smart" appliances, and to what extent?

1562 **BACKGROUND:** It is speculated that the integration of smart water meters with other household  
1563 appliances could be possible and assist water conservation by controlling use to optimal levels.

1564 \*

1565 **Only answer this question if the following conditions are met:**

1566 Answer was 'Yes' at question '74 [M1]' (Do you want to comment on the possible benefits of  
1567 customer communications from digital water metering? (For each suggested benefit, if possible,  
1568 please include in the text boxes below an explanation for your opinion. Please try to cover some of  
1569 the following aspects in your response: - Discuss the extent of the benefit (eg % reduction),and any  
1570 evidence you may have to support that level of benefit - Discuss any examples where you have seen  
1571 that benefit being demonstrated in smart meter pilot trials or roll-outs - Discuss any barriers that  
1572 may need to be overcome before the benefit can be fully extracted from a smart meter system.) )

1573 Please write your answer here:

1574

1575 **New products and services**

1576 This block of potential benefits covers a range of new products and services enabled by digital water  
1577 metering.

1578 []

1579 **Do you want to comment on possible new products and services?**

1580 **(For each suggested new product or service, if possible, please include in the text boxes below an**  
1581 **explanation for your opinion.**

1582 **Please try to cover some of the following aspects in your response:**

1583 **- Discuss the extent of the benefit (eg % reduction),and any evidence you may have to support**  
1584 **that level of benefit**

1585 **- Discuss any examples where you have seen that benefit being demonstrated in smart meter**  
1586 **pilot trials or roll-outs**

1587 - Discuss any barriers that may need to be overcome before the benefit can be fully extracted  
1588 from a smart meter system.)

1589 \*

1590 **Only answer this question if the following conditions are met:**

1591 Answer was 'Yes' at question '1 [A2]' (Completion of this survey is voluntary and you may quit at  
1592 any time. Your participation is anonymous. By completing this survey, you are giving your consent  
1593 to participate in this study. Do you consent to participating and wish to proceed with this survey? )  
1594 and Answer was at question '8 [D0]' (Which blocks of potential benefits would you like to comment  
1595 on? (Only questions in selected blocks will be presented.))

1596 Please choose **only one** of the following:

- 1597 • ☐ Yes  
1598 • ☐ No

1599 []

1600 **From your experience/knowledge, will digital water metering enable customer selection of their**  
1601 **billing day, and to what extent would customers and water businesses benefit?**

1602 **BACKGROUND:** If digital water meters provide a reading each hour of each day it is suggested  
1603 that customers could be provided with the opportunity to nominate the day of the month that  
1604 their meter is read for billing purposes. This could help customers with their household/business  
1605 budgeting and cash flow and offer the water company more certainty of payment.

1606 \*

1607 **Only answer this question if the following conditions are met:**

1608 Answer was 'Yes' at question '78 [N1]' (Do you want to comment on possible new products and  
1609 services? (For each suggested new product or service, if possible, please include in the text boxes  
1610 below an explanation for your opinion. Please try to cover some of the following aspects in your  
1611 response: - Discuss the extent of the benefit (eg % reduction), and any evidence you may have to  
1612 support that level of benefit - Discuss any examples where you have seen that benefit being  
1613 demonstrated in smart meter pilot trials or roll-outs - Discuss any barriers that may need to be  
1614 overcome before the benefit can be fully extracted from a smart meter system.))

1615 Please write your answer here:

1616

1617 []

From your experience/knowledge, will digital water metering enable information to be provided to customers on their evaporative cooler water use, and to what extent would customers benefit?

**BACKGROUND:** In southern states of Australia, evaporative coolers are used to cool homes as they are considered more cost effective. They are more energy efficient but have the additional cost of water used to cool the filters. Hourly meter readings could provide customers with an opportunity to monitor the water use efficiency of their evaporative coolers during hot periods, especially overnight when other appliances are not being used. High readings might signal parts failure or the need for servicing or the replacing of the appliance.

\*

**Only answer this question if the following conditions are met:**

Answer was 'Yes' at question '78 [N1]' (Do you want to comment on possible new products and services? (For each suggested new product or service, if possible, please include in the text boxes below an explanation for your opinion. Please try to cover some of the following aspects in your response: - Discuss the extent of the benefit (eg % reduction), and any evidence you may have to support that level of benefit - Discuss any examples where you have seen that benefit being demonstrated in smart meter pilot trials or roll-outs - Discuss any barriers that may need to be overcome before the benefit can be fully extracted from a smart meter system.) )

Please write your answer here:

[]

From your experience/knowledge, will digital water metering enable non-residential customer end-use data logging and analytics, and to what extent would customers benefit?

**BACKGROUND:** Considerable effort has been put into residential end-use analysis. Non-residential customers in high-water use industries may benefit from water companies offering a service involving similar data logging at high frequency. This could enable individual customer end-use analytics and ongoing tracking of water use for machinery and process performance analysis.

\*

**Only answer this question if the following conditions are met:**

Answer was 'Yes' at question '78 [N1]' (Do you want to comment on possible new products and services? (For each suggested new product or service, if possible, please include in the text boxes below an explanation for your opinion. Please try to cover some of the following aspects in your response: - Discuss the extent of the benefit (eg % reduction), and any evidence you may have to support that level of benefit - Discuss any examples where you have seen that benefit being

demonstrated in smart meter pilot trials or roll-outs - Discuss any barriers that may need to be overcome before the benefit can be fully extracted from a smart meter system.) )

Please write your answer here:

[]

**From your experience/knowledge, will digital water metering enable customised product offers to be made to customers, and to what extent would they benefit?**

**BACKGROUND:** With digital water metering generating so much more information about customer water use patterns and potential profiling, water companies may have opportunities to customise product offers to individual customers and customer segments. These might include plumbing services, rain water tanks, appliance servicing and appliance upgrades. Such targeted marketing programs based on water use patterns could be used to reduce marketing cost and boost sales outcomes.

\*

**Only answer this question if the following conditions are met:**

Answer was 'Yes' at question '78 [N1]' (Do you want to comment on possible new products and services? (For each suggested new product or service, if possible, please include in the text boxes below an explanation for your opinion. Please try to cover some of the following aspects in your response: - Discuss the extent of the benefit (eg % reduction), and any evidence you may have to support that level of benefit - Discuss any examples where you have seen that benefit being demonstrated in smart meter pilot trials or roll-outs - Discuss any barriers that may need to be overcome before the benefit can be fully extracted from a smart meter system.) )

Please write your answer here:

[]

**From your experience/knowledge, will digital water metering enable water businesses to offer customers vacant property water use monitoring and alerting, and to what extent would they benefit?**

**BACKGROUND:** Using data from digital water metering and with a leak alerting system in place, the functionality could be extended to allow the customer to set the trigger flows at zero so that any flow will send an alert to the customer. This service could also be charged for to defray costs. Controlled through a portal, such a service might be useful to customers on extended holidays away from home, holiday home owners and untenanted property owners. The

1685 frequency of the alert (eg. Maximum 1 alert per day) and the alert method could be limited to  
1686 control costs of the service.

1687 \*

1688 **Only answer this question if the following conditions are met:**

1689 Answer was 'Yes' at question '78 [N1]' (Do you want to comment on possible new products and  
1690 services? (For each suggested new product or service, if possible, please include in the text boxes  
1691 below an explanation for your opinion. Please try to cover some of the following aspects in your  
1692 response: - Discuss the extent of the benefit (eg % reduction),and any evidence you may have to  
1693 support that level of benefit - Discuss any examples where you have seen that benefit being  
1694 demonstrated in smart meter pilot trials or roll-outs - Discuss any barriers that may need to be  
1695 overcome before the benefit can be fully extracted from a smart meter system.) )

1696 Please write your answer here:

1697

1698 []

1699 **From your experience/knowledge, will digital water metering enable water businesses to offer**  
1700 **benchmarking of water demand of evaporative coolers, and to what extent would they benefit?**

1701 **BACKGROUND:** In southern states of Australian evaporative coolers are used as energy efficient  
1702 appliances during hot weather. Digital water meters being read hourly could provide data so that  
1703 the water use of these appliances could be checked. Benchmarks for coolers of similar age, make  
1704 and model might be able to be developed so that the efficiency of an individual customer's  
1705 appliance could be compared to benchmarks of similar appliances.

1706 \*

1707 **Only answer this question if the following conditions are met:**

1708 Answer was 'Yes' at question '78 [N1]' (Do you want to comment on possible new products and  
1709 services? (For each suggested new product or service, if possible, please include in the text boxes  
1710 below an explanation for your opinion. Please try to cover some of the following aspects in your  
1711 response: - Discuss the extent of the benefit (eg % reduction),and any evidence you may have to  
1712 support that level of benefit - Discuss any examples where you have seen that benefit being  
1713 demonstrated in smart meter pilot trials or roll-outs - Discuss any barriers that may need to be  
1714 overcome before the benefit can be fully extracted from a smart meter system.) )

1715 Please write your answer here:

1716

1717 **Legal actions**

1718 This block of potential benefits covers legal action over water use and unpaid accounts.

1719 []

1720 Do you want to comment on possible benefits for legal action and illegal water use?

1721 (For each suggested benefit, if possible, please include in the text boxes below an explanation for  
1722 your opinion.

1723 Please try to cover some of the following aspects in your response:

1724 - Discuss the extent of the benefit (eg % reduction), and any evidence you may have to support  
1725 that level of benefit

1726 - Discuss any examples where you have seen that benefit being demonstrated in smart meter  
1727 pilot trials or roll-outs

1728 - Discuss any barriers that may need to be overcome before the benefit can be fully extracted  
1729 from a smart meter system.)

1730 \*

1731 Only answer this question if the following conditions are met:

1732 Answer was 'Yes' at question '1 [A2]' (Completion of this survey is voluntary and you may quit at  
1733 any time. Your participation is anonymous. By completing this survey, you are giving your consent  
1734 to participate in this study. Do you consent to participating and wish to proceed with this survey? )  
1735 and Answer was at question '8 [D0]' (Which blocks of potential benefits would you like to comment  
1736 on? (Only questions in selected blocks will be presented.))

1737 Please choose **only one** of the following:

1738 • ☐ Yes

1739 • ☐ No

1740 []

1741 From your experience/knowledge, will digital water metering lead to reduced supply restriction  
1742 case costs, and to what extent?

1743 **BACKGROUND:** When payment is withheld by a customer the water company may eventually  
1744 restrict the flow into the property in order to reduce their potential ongoing losses. This requires  
1745 a crew to attend the property to effect the restriction and then again once the non-payment issue  
1746 is resolved. Digital metering with leak alerting, online access to usage data and bill prediction  
1747 may reduce the issues that lead to disputes and to the restriction of service cases and, therefore,  
1748 costs.

1749 \*

1750 **Only answer this question if the following conditions are met:**

1751 Answer was 'Yes' at question '85 [P1]' (Do you want to comment on possible benefits for legal action  
1752 and illegal water use? (For each suggested benefit, if possible, please include in the text boxes below  
1753 an explanation for your opinion. Please try to cover some of the following aspects in your response: -  
1754 Discuss the extent of the benefit (eg % reduction),and any evidence you may have to support that  
1755 level of benefit - Discuss any examples where you have seen that benefit being demonstrated in  
1756 smart meter pilot trials or roll-outs - Discuss any barriers that may need to be overcome before the  
1757 benefit can be fully extracted from a smart meter system.) )

1758 Please write your answer here:

1759

1760 []

1761 **From your experience/knowledge, will digital water metering lead to reduced debt recovery/legal**  
1762 **action case costs, and to what extent?**

1763 **BACKGROUND: When payment is withheld by a customer the water company may undertake**  
1764 **debt recovery processes including taking legal action in order to recover their losses. Digital**  
1765 **metering with leak alerting, online access to usage data and bill prediction may reduce the issues**  
1766 **that lead to disputes and to the cost recovery and legal action cases and, therefore, costs.**

1767 \*

1768 **Only answer this question if the following conditions are met:**

1769 Answer was 'Yes' at question '85 [P1]' (Do you want to comment on possible benefits for legal action  
1770 and illegal water use? (For each suggested benefit, if possible, please include in the text boxes below  
1771 an explanation for your opinion. Please try to cover some of the following aspects in your response: -  
1772 Discuss the extent of the benefit (eg % reduction),and any evidence you may have to support that  
1773 level of benefit - Discuss any examples where you have seen that benefit being demonstrated in  
1774 smart meter pilot trials or roll-outs - Discuss any barriers that may need to be overcome before the  
1775 benefit can be fully extracted from a smart meter system.) )

1776 Please write your answer here:

1777

1778 []

1779 **From your experience/knowledge, will digital water metering enable automated regulation**  
1780 **compliance monitoring, and to what extent would water companies benefit?**

1781 **BACKGROUND: Water companies are sometimes required to impose water restrictions or**  
1782 **implement bans on some water uses. These restrictions and bans are a water conservation**

measure and are intended to be equitable for all citizens - eg. Odds/Evens garden irrigation, winter ban on irrigation. Using the hourly data from digital water meters, data analytics may identify breaches which could then be investigated.

\*

**Only answer this question if the following conditions are met:**

Answer was 'Yes' at question '85 [P1]' (Do you want to comment on possible benefits for legal action and illegal water use? (For each suggested benefit, if possible, please include in the text boxes below an explanation for your opinion. Please try to cover some of the following aspects in your response: - Discuss the extent of the benefit (eg % reduction), and any evidence you may have to support that level of benefit - Discuss any examples where you have seen that benefit being demonstrated in smart meter pilot trials or roll-outs - Discuss any barriers that may need to be overcome before the benefit can be fully extracted from a smart meter system.) )

Please write your answer here:

**Business value - goodwill**

This block of potential benefits covers increased business value through changes to customers' attitude towards the water business resulting from the other benefits from digital water metering.

[]

**Do you want to proceed to comment on changes to the value of water businesses (goodwill) from the other benefits of digital water metering?**

**In considering any benefit to a water company in the form of goodwill from digital water metering, respondents are invited to consider their attitude as customers of water companies as well as any professional knowledge they may have in the area.**

**(For each suggested benefit, if possible, please include in the text boxes below an explanation for your opinion.**

**Please try to cover some of the following aspects in your response:**

- Discuss the extent of the benefit (eg % reduction), and any evidence you may have to support that level of benefit

- Discuss any examples where you have seen that benefit being demonstrated in smart meter pilot trials or roll-outs

- Discuss any barriers that may need to be overcome before the benefit can be fully extracted from a smart meter system.)

\*

1816 **Only answer this question if the following conditions are met:**

1817 Answer was 'Yes' at question '1 [A2]' (Completion of this survey is voluntary and you may quit at  
1818 any time. Your participation is anonymous. By completing this survey, you are giving your consent  
1819 to participate in this study. Do you consent to participating and wish to proceed with this survey? )

1820 Please choose **only one** of the following:

- 1821 • ☐ Yes  
1822 • ☐ No

1823 Goodwill can be considered at two levels, either, a strict accounting definition, or simply customers'  
1824 attitude towards the company.

1825 An improved attitude might be witnessed though a less confrontational, more relaxed relationship  
1826 resulting in more understanding response when customer services are impacted. It may show up in  
1827 customer satisfaction surveys.

1828 The Australian Tax Office provides the following statement on goodwill (refer qc21245 ATO Market  
1829 valuation for tax purposes, issued 18 Aug 2017, p40)

1830 **"Goodwill**

1831 Tax law does not define 'goodwill'. However, the term is defined in a range of  
1832 industry applications. AASB 3 Business combinations defines goodwill as:  
1833 Future economic benefits arising from assets that are not capable of being  
1834 individually identified and separately recognised.

1835 AASB 3 also describes how goodwill is measured (paragraph 51(b)):  
1836 ...the excess of the cost of the business combination over the acquirer's  
1837 interest in the net fair value of the identifiable assets, liabilities and contingent  
1838 liabilities..."

1839 **"]**

1840 **From your experience/knowledge, will water business gain an improvement of value of goodwill**  
1841 **from information sharing with their customers, and to what extent?**

1842 **BACKGROUND: Customers may appreciate being alerted to possible leaks and to have access to**  
1843 **more detailed water usage information from their water company on which they can make better**  
1844 **decisions.**

1845 \*

1846 **Only answer this question if the following conditions are met:**

1847 Answer was 'Yes' at question '89 [F1]' (Do you want to proceed to comment on changes to the value  
1848 of water businesses (goodwill) from the other benefits of digital water metering? In considering any  
1849 benefit to a water company in the form of goodwill from digital water metering, respondents are

invited to consider their attitude as customers of water companies as well as any professional knowledge they may have in the area. (For each suggested benefit, if possible, please include in the text boxes below an explanation for your opinion. Please try to cover some of the following aspects in your response: - Discuss the extent of the benefit (eg % reduction), and any evidence you may have to support that level of benefit - Discuss any examples where you have seen that benefit being demonstrated in smart meter pilot trials or roll-outs - Discuss any barriers that may need to be overcome before the benefit can be fully extracted from a smart meter system.) )

Please write your answer here:

□

**From your experience/knowledge, will water business gain an improvement of value of goodwill from new products and services, and to what extent?**

**BACKGROUND: Customers may appreciate a range of quality and flexible products and services and gain some economic value from them.**

\*

**Only answer this question if the following conditions are met:**

Answer was 'Yes' at question '89 [F1]' (Do you want to proceed to comment on changes to the value of water businesses (goodwill) from the other benefits of digital water metering? In considering any benefit to a water company in the form of goodwill from digital water metering, respondents are invited to consider their attitude as customers of water companies as well as any professional knowledge they may have in the area. (For each suggested benefit, if possible, please include in the text boxes below an explanation for your opinion. Please try to cover some of the following aspects in your response: - Discuss the extent of the benefit (eg % reduction), and any evidence you may have to support that level of benefit - Discuss any examples where you have seen that benefit being demonstrated in smart meter pilot trials or roll-outs - Discuss any barriers that may need to be overcome before the benefit can be fully extracted from a smart meter system.) )

Please write your answer here:

□

**From your experience/knowledge, will water business gain an improvement of value of goodwill from customer recognition of operational efficiency and capital management, and to what extent?**

**BACKGROUND: Customers may appreciate that their water company is improving its efficiency, investing prudently and utilising contemporary technologies.**

1883 \*

1884 **Only answer this question if the following conditions are met:**

1885 Answer was 'Yes' at question '89 [F1]' (Do you want to proceed to comment on changes to the value  
1886 of water businesses (goodwill) from the other benefits of digital water metering? In considering any  
1887 benefit to a water company in the form of goodwill from digital water metering, respondees are  
1888 invited to consider their attitude as customers of water companies as well as any professional  
1889 knowledge they may have in the area. (For each suggested benefit, if possible, please include in the  
1890 text boxes below an explanation for your opinion. Please try to cover some of the following aspects  
1891 in your response: - Discuss the extent of the benefit (eg % reduction), and any evidence you may have  
1892 to support that level of benefit - Discuss any examples where you have seen that benefit being  
1893 demonstrated in smart meter pilot trials or roll-outs - Discuss any barriers that may need to be  
1894 overcome before the benefit can be fully extracted from a smart meter system.) )

1895 Please write your answer here:

1896

1897 []

1898 **From your experience/knowledge, will water business gain an improvement of value of goodwill**  
1899 **from more flexible tariffs, and to what extent?**

1900 **BACKGROUND: New tariff options offered by water companies may increase customer choice**  
1901 **which customers will appreciate and possibly gain benefit from.**

1902 \*

1903 **Only answer this question if the following conditions are met:**

1904 Answer was 'Yes' at question '89 [F1]' (Do you want to proceed to comment on changes to the value  
1905 of water businesses (goodwill) from the other benefits of digital water metering? In considering any  
1906 benefit to a water company in the form of goodwill from digital water metering, respondees are  
1907 invited to consider their attitude as customers of water companies as well as any professional  
1908 knowledge they may have in the area. (For each suggested benefit, if possible, please include in the  
1909 text boxes below an explanation for your opinion. Please try to cover some of the following aspects  
1910 in your response: - Discuss the extent of the benefit (eg % reduction), and any evidence you may have  
1911 to support that level of benefit - Discuss any examples where you have seen that benefit being  
1912 demonstrated in smart meter pilot trials or roll-outs - Discuss any barriers that may need to be  
1913 overcome before the benefit can be fully extracted from a smart meter system.) )

1914 Please write your answer here:

1915

1916 **End of Survey**

1917 Thank you for completing this survey.

1918 []

1919 Thank you for your comments on the list of potential benefits.

1920 This is the last question in the survey.

1921 Do you have any suggestions of other benefits not covered in the previous questions? Or any  
1922 comments on the survey? Or would you like to participate further by being interviewed and/or  
1923 supply data or information into the study - if so, please discuss your interest with your company's  
1924 liaison for this study or contact the research candidate, Ian Monks, [ian.monks@griffithuni.edu.au](mailto:ian.monks@griffithuni.edu.au)  
1925 ?

1926 \*

1927 Please write your answer here:

1928

1929

1930

1931

1932 Submit your survey.

1933 Thank you for completing this survey.

1934

1935

1936

## References

1. Monks, I., et al., *Expert opinion valuation method to quantify digital water metering benefits (in press)*. 2020.

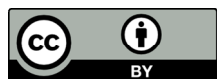

© 2020 by the authors. Submitted for possible open access publication under the terms and conditions of the Creative Commons Attribution (CC BY) license (<http://creativecommons.org/licenses/by/4.0/>).
